# Supplementary material for: Pd and Pt metal atoms as electron donors in σ-hole bonded complexes
Source: Royal Society of Chemistry journal article supplement (doi:10.1039/d3cp03171c), 2023-01-01
Supplement: d3cp03171c1.pdf [file d3cp03171c1.pdf]

## Supplementary Information

### **Pd and Pt Metal Atoms as Electron Donor in $\sigma$ -Hole Bonded Complexes**

Wiktor Zierkiewicz,<sup>1\*</sup> Beata Kizior,<sup>1</sup> Mariusz Michalczyk,<sup>1</sup> Aneta Jezierska<sup>2</sup> and Steve Scheiner<sup>3\*</sup>

<sup>1</sup> Wrocław University of Science and Technology, Faculty of Chemistry, Wybrzeże Wyspiańskiego 27, 50-370 Wrocław, Poland

<sup>2</sup> University of Wrocław, Faculty of Chemistry, F. Joliot-Curie 14, 50-383 Wrocław, Poland

<sup>3</sup> Utah State University Logan, Department of Chemistry and Biochemistry, Utah 84322-0300, United States

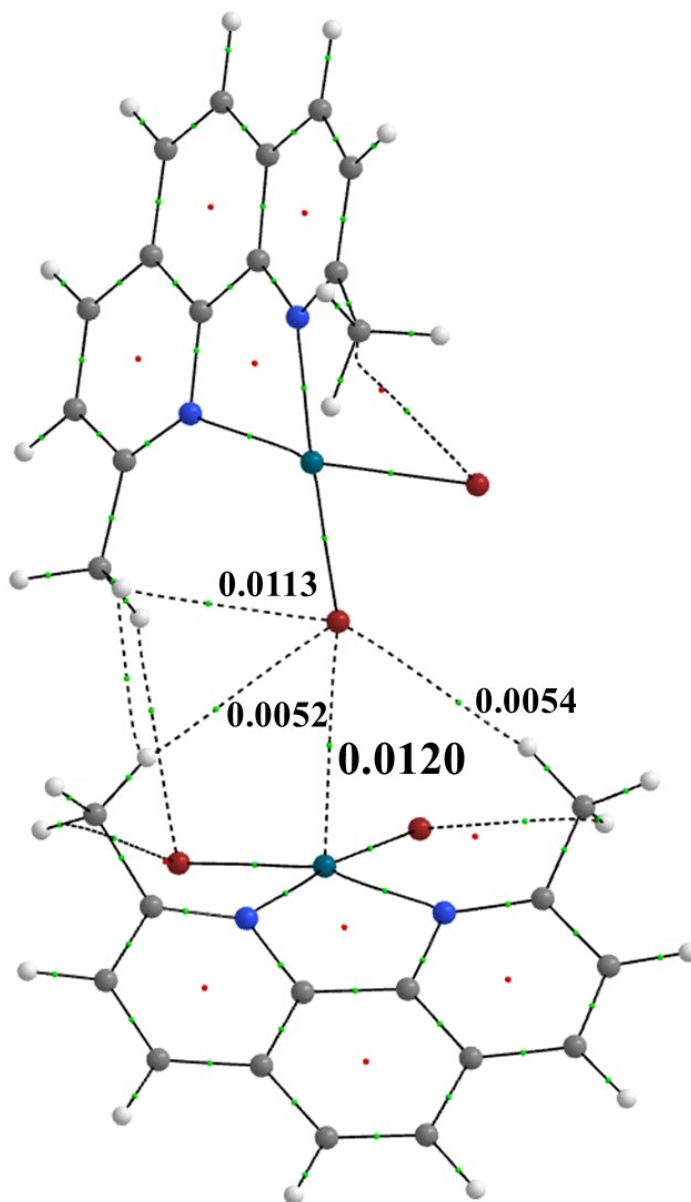

**Figure S1.** Dimeric form of [Pd(2,9-dimethylphenanthroline)Br<sub>2</sub>] extracted from the crystal structure (CSD identifier: **DAPYUQ**). Only hydrogen atoms were optimized using PBE0-D3/def2-TZVP level of theory. Electron density ( $\rho$ ) [a.u.] values at BCPs are indicated. Green dots show BCPs while red – RCPs. Color coding: carbon, grey; nitrogen, blue; palladium, cyan; hydrogen, white; bromine, brown.

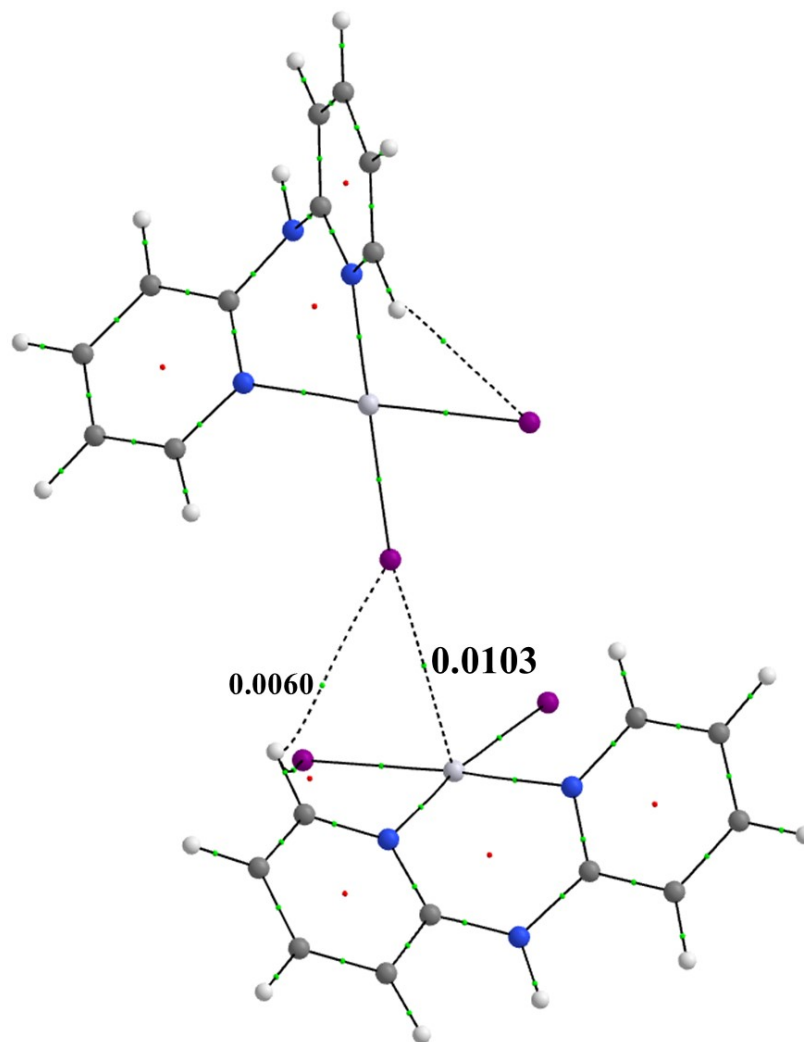

**Figure S2.** Dimeric form of (Di-2-pyridylamine- $\kappa^2N^2,N^2'$ )diiodido-platinum(II) extracted from the crystal structure (CSD identifier: **YAVCIJ**). Only hydrogen atoms were optimized using PBE0-D3/def2-TZVP level of theory. Electron density ( $\rho$ ) [a.u.] values at BCPs are indicated. Green dots show BCPs while red – RCPs. Color coding: carbon, grey; nitrogen, blue; platinum, silver; hydrogen, white; iodine, violet.

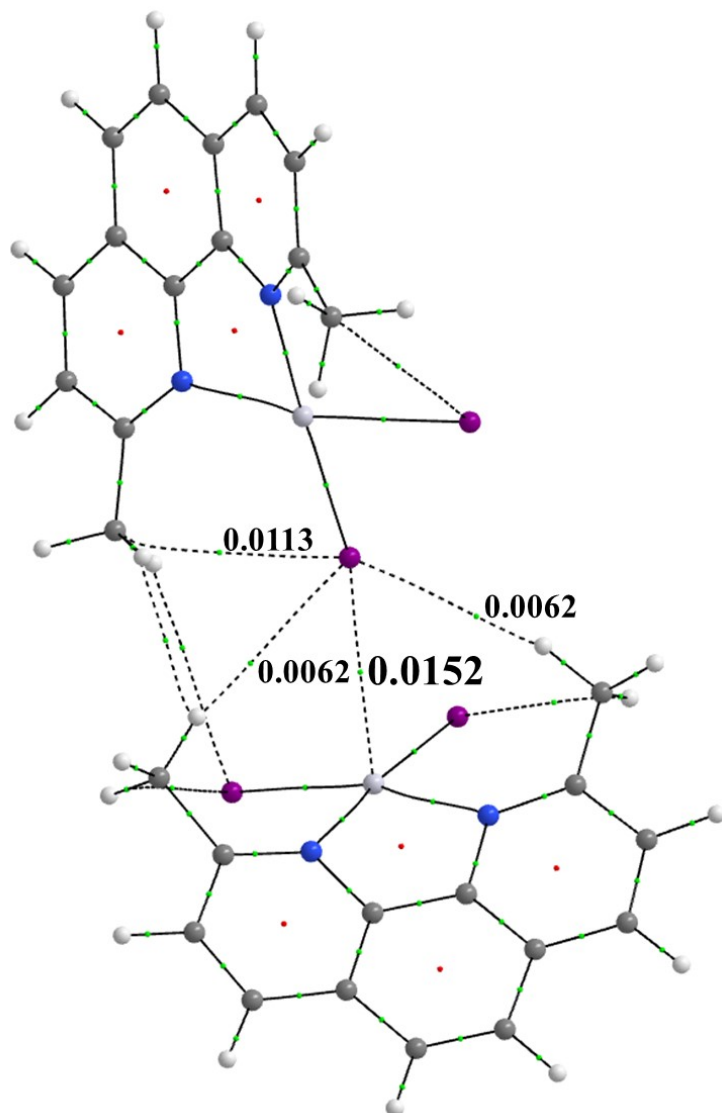

**Figure S3.** Dimeric form of (2,9-Dimethyl-1,10-phenanthroline)-di-iodo-platinum(II) extracted from the crystal structure (CSD identifier: **ZEWXUU**). Only hydrogen atoms were optimized using PBE0-D3/def2-TZVP level of theory. Electron density ( $\rho$ ) [a.u.] values at BCPs are indicated. Green dots show BCPs while red – RCPs. Color coding: carbon, grey; nitrogen, blue; platinum, silver; hydrogen, white; iodine, violet.

**Table S1.** Electron density and its Laplacian at Bond Critical Points (BCPs) and other QTAIM descriptors of dimeric structures extracted from the Cambridge Structural Database (CSD). Only hydrogen atoms were optimized. QTAIM parameters were calculated at the PBE0-D3/def2-TZVP level of theory.

| Number | CSD number | Interaction    | $\rho$ [a.u.] | $\nabla^2\rho$ [a.u.] | V [a.u.] | G [a.u.] | H, kcal/mol |
|--------|------------|----------------|---------------|-----------------------|----------|----------|-------------|
| 1      | DAPYUQ     | Pd $\cdots$ Br | 0.012         | 0.034                 | -0.007   | 0.008    | 0.387       |
| 2      | YAVCIJ     | Pt $\cdots$ I  | 0.010         | 0.025                 | -0.005   | 0.006    | 0.336       |
| 3      | ZEWXUU     | Pt $\cdots$ I  | 0.015         | 0.036                 | -0.009   | 0.009    | 0.083       |

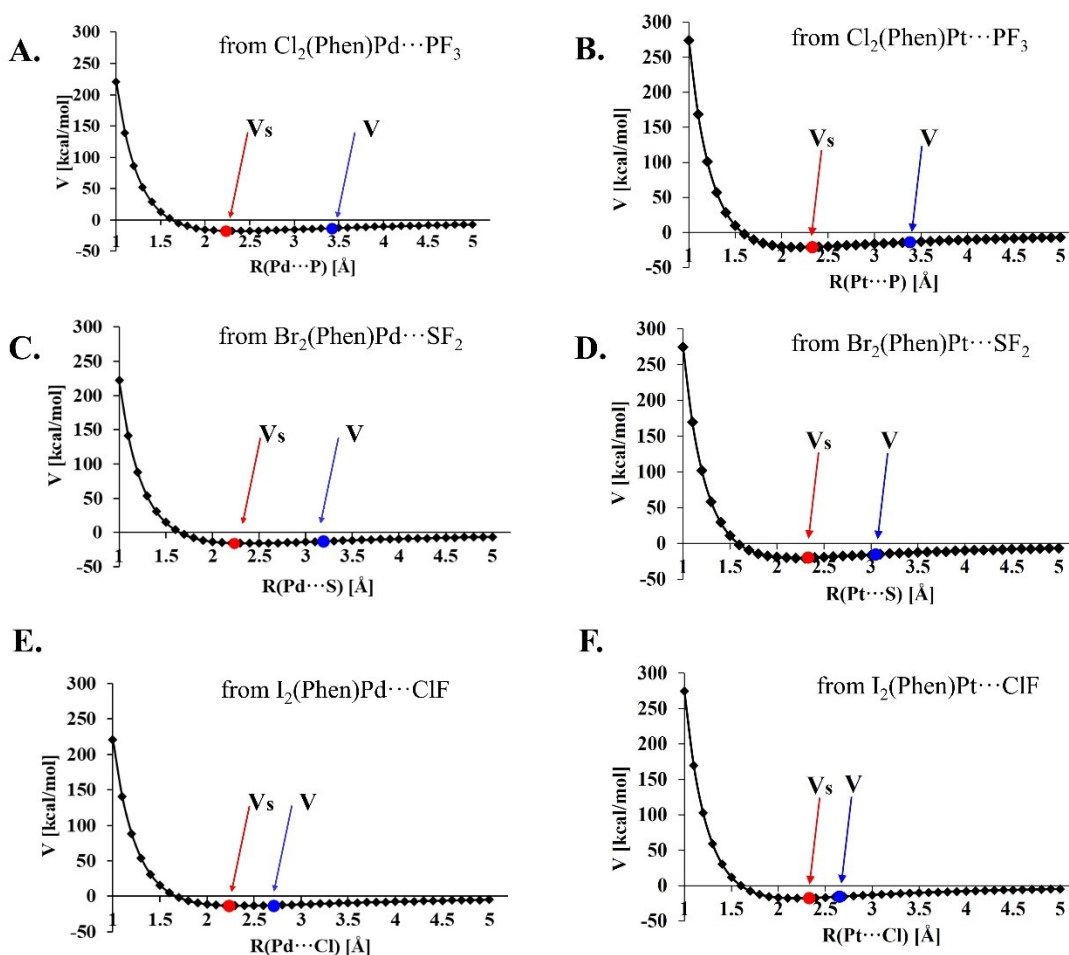

**Figure S4.** Plots showing the relationship between the value of the electrostatic potential and the distance from the metal atom (M) at the point lying on the axis passing through the M and A atoms. In addition, points corresponding to the values of  $V_s$  and  $V$  are highlighted (their values are given in Table 2).

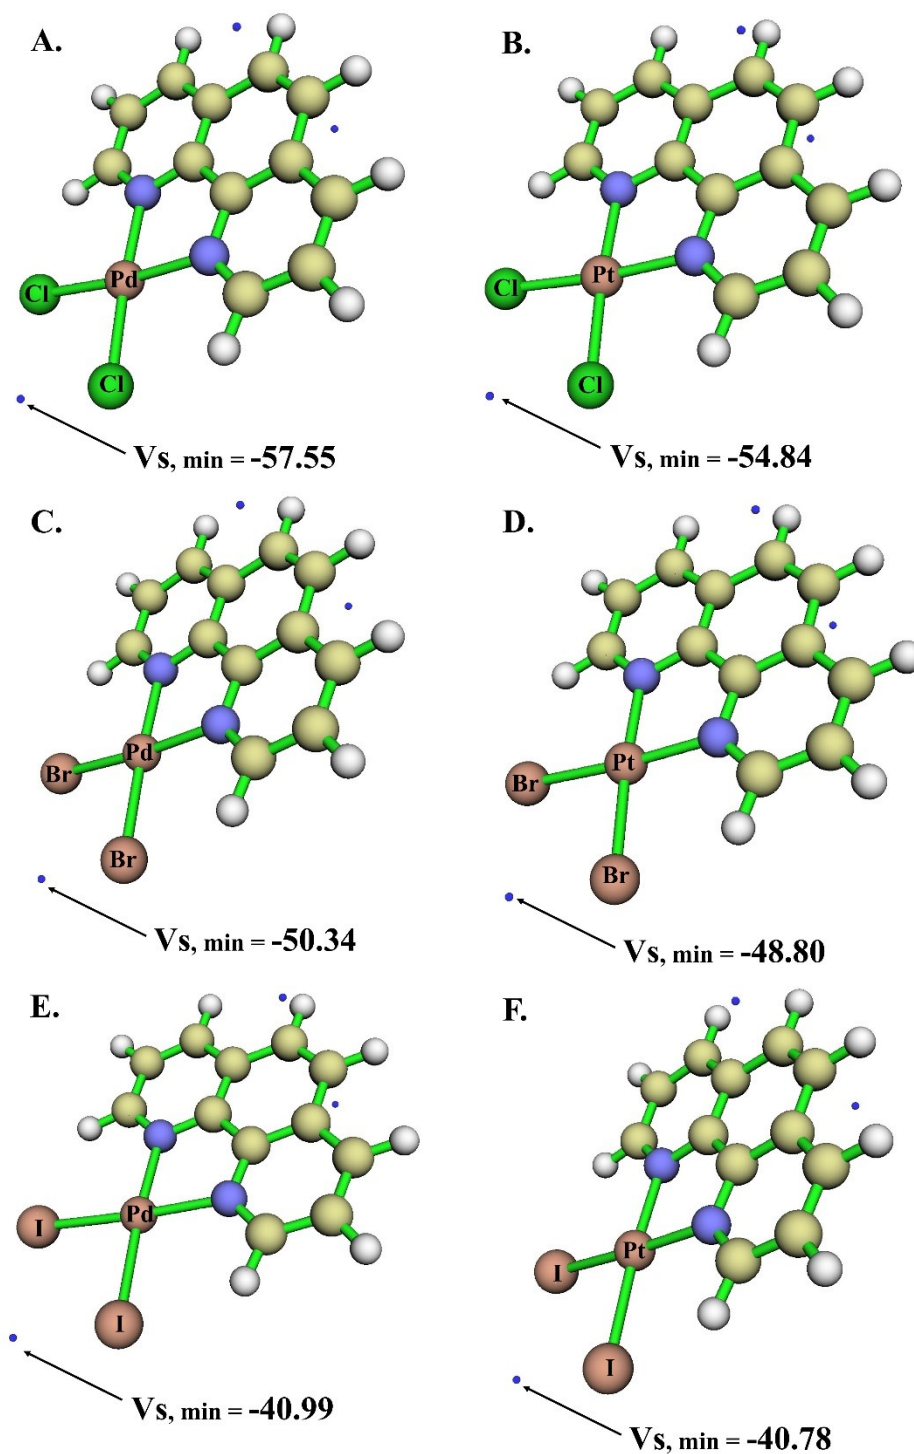

**Figure S5.** Diagrams representing the positions and values (in kcal/mol) of the minima of electrostatic potential ( $V_{s, \min}$ ) near the metal atom for the six selected LBs (in complex geometry). Labeling of compounds corresponds to Figure S4.

**Table S2.** HOMA index values for rings of the studied Lewis Bases.

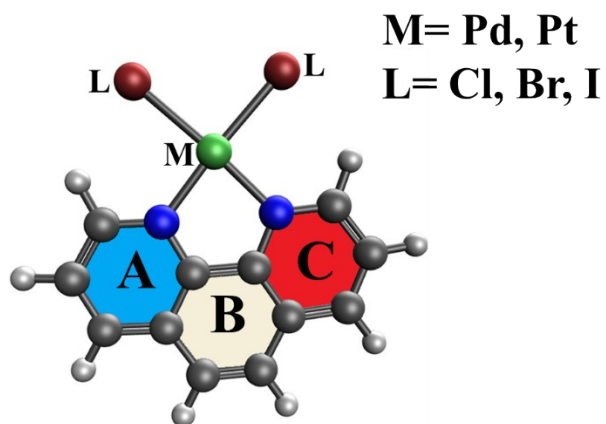

| Complex                  | <i>HOMA index</i> |        |        | Complex                  | <i>HOMA index</i> |        |        |
|--------------------------|-------------------|--------|--------|--------------------------|-------------------|--------|--------|
|                          | RING A            | RING B | RING C |                          | RING A            | RING B | RING C |
| Cl <sub>2</sub> (Phen)Pd | 0.954             | 0.750  | 0.954  | Cl <sub>2</sub> (Phen)Pt | 0.960             | 0.766  | 0.960  |
| Br <sub>2</sub> (Phen)Pd | 0.952             | 0.746  | 0.952  | Br <sub>2</sub> (Phen)Pt | 0.958             | 0.764  | 0.958  |
| I <sub>2</sub> (Phen)Pd  | 0.949             | 0.734  | 0.949  | I <sub>2</sub> (Phen)Pt  | 0.956             | 0.758  | 0.956  |

**Table S3.** HOMA index values for rings of the studied complexes. The rings designation is shown above Table S2.

| Complex                                     | HOMA index |        |        | Complex                                     | HOMA index |        |        |
|---------------------------------------------|------------|--------|--------|---------------------------------------------|------------|--------|--------|
|                                             | RING A     | RING B | RING C |                                             | RING A     | RING B | RING C |
| Cl <sub>2</sub> (Phen)Pd···PF <sub>3</sub>  | 0.955      | 0.753  | 0.955  | Cl <sub>2</sub> (Phen)Pt···PF <sub>3</sub>  | 0.960      | 0.768  | 0.960  |
| Cl <sub>2</sub> (Phen)Pd···AsF <sub>3</sub> | 0.954      | 0.756  | 0.954  | Cl <sub>2</sub> (Phen)Pt···AsF <sub>3</sub> | 0.960      | 0.769  | 0.960  |
| Cl <sub>2</sub> (Phen)Pd···SbF <sub>3</sub> | 0.955      | 0.759  | 0.954  | Cl <sub>2</sub> (Phen)Pt···SbF <sub>3</sub> | 0.959      | 0.772  | 0.960  |
| Cl <sub>2</sub> (Phen)Pd···SF <sub>2</sub>  | 0.955      | 0.753  | 0.956  | Cl <sub>2</sub> (Phen)Pt···SF <sub>2</sub>  | 0.960      | 0.767  | 0.960  |
| Cl <sub>2</sub> (Phen)Pd···SeF <sub>2</sub> | 0.955      | 0.755  | 0.956  | Cl <sub>2</sub> (Phen)Pt···SeF <sub>2</sub> | 0.960      | 0.768  | 0.961  |
| Cl <sub>2</sub> (Phen)Pd···TeF <sub>2</sub> | 0.956      | 0.758  | 0.956  | Cl <sub>2</sub> (Phen)Pt···TeF <sub>2</sub> | 0.961      | 0.770  | 0.961  |
| Cl <sub>2</sub> (Phen)Pd···ClF              | 0.954      | 0.753  | 0.954  | Cl <sub>2</sub> (Phen)Pt···ClF              | 0.959      | 0.766  | 0.959  |
| Cl <sub>2</sub> (Phen)Pd···BrF              | 0.954      | 0.754  | 0.954  | Cl <sub>2</sub> (Phen)Pt···BrF              | 0.959      | 0.766  | 0.959  |
| Cl <sub>2</sub> (Phen)Pd···IF               | 0.954      | 0.755  | 0.954  | Cl <sub>2</sub> (Phen)Pt···IF               | 0.959      | 0.767  | 0.959  |
| Br <sub>2</sub> (Phen)Pd···PF <sub>3</sub>  | 0.953      | 0.749  | 0.953  | Br <sub>2</sub> (Phen)Pt···PF <sub>3</sub>  | 0.959      | 0.766  | 0.959  |
| Br <sub>2</sub> (Phen)Pd···AsF <sub>3</sub> | 0.953      | 0.752  | 0.953  | Br <sub>2</sub> (Phen)Pt···AsF <sub>3</sub> | 0.958      | 0.768  | 0.958  |
| Br <sub>2</sub> (Phen)Pd···SbF <sub>3</sub> | 0.953      | 0.756  | 0.953  | Br <sub>2</sub> (Phen)Pt···SbF <sub>3</sub> | 0.958      | 0.770  | 0.958  |
| Br <sub>2</sub> (Phen)Pd···SF <sub>2</sub>  | 0.954      | 0.749  | 0.953  | Br <sub>2</sub> (Phen)Pt···SF <sub>2</sub>  | 0.959      | 0.765  | 0.959  |
| Br <sub>2</sub> (Phen)Pd···SeF <sub>2</sub> | 0.954      | 0.751  | 0.953  | Br <sub>2</sub> (Phen)Pt···SeF <sub>2</sub> | 0.959      | 0.766  | 0.959  |
| Br <sub>2</sub> (Phen)Pd···TeF <sub>2</sub> | 0.955      | 0.753  | 0.954  | Br <sub>2</sub> (Phen)Pt···TeF <sub>2</sub> | 0.959      | 0.768  | 0.960  |
| Br <sub>2</sub> (Phen)Pd···ClF              | 0.952      | 0.748  | 0.952  | Br <sub>2</sub> (Phen)Pt···ClF              | 0.957      | 0.763  | 0.957  |
| Br <sub>2</sub> (Phen)Pd···BrF              | 0.952      | 0.749  | 0.952  | Br <sub>2</sub> (Phen)Pt···BrF              | 0.957      | 0.764  | 0.957  |
| Br <sub>2</sub> (Phen)Pd···IF <sub>3</sub>  | 0.952      | 0.750  | 0.952  | Br <sub>2</sub> (Phen)Pt···IF               | 0.957      | 0.765  | 0.957  |
| I <sub>2</sub> (Phen)Pd···PF <sub>3</sub>   | 0.950      | 0.738  | 0.950  | I <sub>2</sub> (Phen)Pt···PF <sub>3</sub>   | 0.956      | 0.760  | 0.956  |
| I <sub>2</sub> (Phen)Pd···AsF <sub>3</sub>  | 0.950      | 0.742  | 0.950  | I <sub>2</sub> (Phen)Pt···AsF <sub>3</sub>  | 0.956      | 0.763  | 0.956  |
| I <sub>2</sub> (Phen)Pd···SbF <sub>3</sub>  | 0.951      | 0.746  | 0.951  | I <sub>2</sub> (Phen)Pt···SbF <sub>3</sub>  | 0.956      | 0.765  | 0.956  |
| I <sub>2</sub> (Phen)Pd···SF <sub>2</sub>   | 0.951      | 0.738  | 0.950  | I <sub>2</sub> (Phen)Pt···SF <sub>2</sub>   | 0.957      | 0.759  | 0.956  |
| I <sub>2</sub> (Phen)Pd···SeF <sub>2</sub>  | 0.952      | 0.740  | 0.951  | I <sub>2</sub> (Phen)Pt···SeF <sub>2</sub>  | 0.957      | 0.760  | 0.956  |
| I <sub>2</sub> (Phen)Pd···TeF <sub>2</sub>  | 0.953      | 0.742  | 0.952  | I <sub>2</sub> (Phen)Pt···TeF <sub>2</sub>  | 0.958      | 0.761  | 0.957  |
| I <sub>2</sub> (Phen)Pd···ClF               | 0.949      | 0.736  | 0.950  | I <sub>2</sub> (Phen)Pt···ClF               | 0.955      | 0.756  | 0.955  |
| I <sub>2</sub> (Phen)Pd···BrF               | 0.950      | 0.737  | 0.950  | I <sub>2</sub> (Phen)Pt···BrF               | 0.955      | 0.757  | 0.955  |
| I <sub>2</sub> (Phen)Pd···IF                | 0.950      | 0.738  | 0.950  | I <sub>2</sub> (Phen)Pt···IF                | 0.955      | 0.759  | 0.955  |



**Table S4.** Bond Critical Points (BCPs) and other descriptors derived from Quantum Theory of Atoms In Molecules (QTAIM) for the studied complexes. QTAIM parameters were calculated at the PBE0-D3/def2-TZVP level of theory.

| Complex                                     | Interaction | Electron density ( $\rho$ ) [a.u.] | Laplacian ( $\nabla^2_{\rho}$ ) [a.u.] | V [a.u.] | G [a.u.] | H [kcal/mol] |
|---------------------------------------------|-------------|------------------------------------|----------------------------------------|----------|----------|--------------|
| Cl <sub>2</sub> (Phen)Pd···PF <sub>3</sub>  | Pd···P      | 0.011                              | 0.024                                  | -0.005   | 0.006    | 0.247        |
| Cl <sub>2</sub> (Phen)Pd···AsF <sub>3</sub> | Pd···As     | 0.017                              | 0.034                                  | -0.009   | 0.009    | -0.261       |
| Cl <sub>2</sub> (Phen)Pd···SbF <sub>3</sub> | Pd···Sb     | 0.020                              | 0.034                                  | -0.011   | 0.010    | -0.879       |
| Cl <sub>2</sub> (Phen)Pd···SF <sub>2</sub>  | Pd···S      | 0.015                              | 0.039                                  | -0.009   | 0.010    | 0.164        |
| Cl <sub>2</sub> (Phen)Pd···SeF <sub>2</sub> | Pd···Se     | 0.022                              | 0.046                                  | -0.014   | 0.013    | -0.769       |
| Cl <sub>2</sub> (Phen)Pd···TeF <sub>2</sub> | Pd···Te     | 0.023                              | 0.042                                  | -0.014   | 0.012    | -1.199       |
| Cl <sub>2</sub> (Phen)Pd···ClF              | Pd···Cl     | 0.036                              | 0.084                                  | -0.029   | 0.025    | -2.393       |
| Cl <sub>2</sub> (Phen)Pd···BrF              | Pd···Br     | 0.035                              | 0.070                                  | -0.025   | 0.021    | -2.528       |
| Cl <sub>2</sub> (Phen)Pd···IF               | Pd···I      | 0.030                              | 0.055                                  | -0.020   | 0.017    | -2.084       |
| Br <sub>2</sub> (Phen)Pd···PF <sub>3</sub>  | Pd···P      | 0.010                              | 0.023                                  | -0.005   | 0.005    | 0.263        |
| Br <sub>2</sub> (Phen)Pd···AsF <sub>3</sub> | Pd···As     | 0.016                              | 0.032                                  | -0.009   | 0.008    | -0.162       |
| Br <sub>2</sub> (Phen)Pd···SbF <sub>3</sub> | Pd···Sb     | 0.019                              | 0.033                                  | -0.010   | 0.009    | -0.718       |
| Br <sub>2</sub> (Phen)Pd···SF <sub>2</sub>  | Pd···S      | 0.015                              | 0.038                                  | -0.009   | 0.009    | 0.223        |
| Br <sub>2</sub> (Phen)Pd···SeF <sub>2</sub> | Pd···Se     | 0.021                              | 0.045                                  | -0.013   | 0.012    | -0.665       |
| Br <sub>2</sub> (Phen)Pd···TeF <sub>2</sub> | Pd···Te     | 0.022                              | 0.041                                  | -0.014   | 0.012    | -1.128       |
| Br <sub>2</sub> (Phen)Pd···ClF              | Pd···Cl     | 0.036                              | 0.084                                  | -0.028   | 0.025    | -2.348       |
| Br <sub>2</sub> (Phen)Pd···BrF              | Pd···Br     | 0.034                              | 0.069                                  | -0.025   | 0.021    | -2.472       |
| Br <sub>2</sub> (Phen)Pd···IF               | Pd···I      | 0.029                              | 0.055                                  | -0.020   | 0.017    | -2.022       |
| I <sub>2</sub> (Phen)Pd···PF <sub>3</sub>   | Pd···P      | 0.010                              | 0.022                                  | -0.005   | 0.005    | 0.260        |
| I <sub>2</sub> (Phen)Pd···AsF <sub>3</sub>  | Pd···As     | 0.014                              | 0.030                                  | -0.008   | 0.008    | -0.051       |
| I <sub>2</sub> (Phen)Pd···SbF <sub>3</sub>  | Pd···Sb     | 0.017                              | 0.031                                  | -0.010   | 0.009    | -0.574       |
| I <sub>2</sub> (Phen)Pd···SF <sub>2</sub>   | Pd···S      | 0.015                              | 0.037                                  | -0.009   | 0.009    | 0.206        |
| I <sub>2</sub> (Phen)Pd···SeF <sub>2</sub>  | Pd···Se     | 0.021                              | 0.044                                  | -0.013   | 0.012    | -0.663       |
| I <sub>2</sub> (Phen)Pd···TeF <sub>2</sub>  | Pd···Te     | 0.022                              | 0.041                                  | -0.014   | 0.012    | -1.166       |
| I <sub>2</sub> (Phen)Pd···ClF               | Pd···Cl     | 0.037                              | 0.085                                  | -0.029   | 0.025    | -2.542       |

|                                             |         |       |       |        |       |        |
|---------------------------------------------|---------|-------|-------|--------|-------|--------|
| I <sub>2</sub> (Phen)Pd···BrF               | Pd···Br | 0.035 | 0.069 | -0.026 | 0.022 | -2.611 |
| I <sub>2</sub> (Phen)Pd···IF                | Pd···I  | 0.029 | 0.054 | -0.020 | 0.017 | -2.119 |
| Cl <sub>2</sub> (Phen)Pt···PF <sub>3</sub>  | Pt···P  | 0.014 | 0.028 | -0.007 | 0.007 | -0.063 |
| Cl <sub>2</sub> (Phen)Pt···AsF <sub>3</sub> | Pt···As | 0.023 | 0.038 | -0.013 | 0.011 | -1.113 |
| Cl <sub>2</sub> (Phen)Pt···SbF <sub>3</sub> | Pt···Sb | 0.027 | 0.038 | -0.016 | 0.013 | -2.004 |
| Cl <sub>2</sub> (Phen)Pt···SF <sub>2</sub>  | Pt···S  | 0.025 | 0.053 | -0.016 | 0.014 | -0.763 |
| Cl <sub>2</sub> (Phen)Pt···SeF <sub>2</sub> | Pt···Se | 0.033 | 0.056 | -0.021 | 0.018 | -2.251 |
| Cl <sub>2</sub> (Phen)Pt···TeF <sub>2</sub> | Pt···Te | 0.034 | 0.049 | -0.022 | 0.017 | -3.074 |
| Cl <sub>2</sub> (Phen)Pt···ClF              | Pt···Cl | 0.050 | 0.099 | -0.039 | 0.032 | -4.622 |
| Cl <sub>2</sub> (Phen)Pt···BrF              | Pt···Br | 0.046 | 0.078 | -0.033 | 0.026 | -4.237 |
| Cl <sub>2</sub> (Phen)Pt···IF               | Pt···I  | 0.039 | 0.061 | -0.027 | 0.021 | -3.585 |
| Br <sub>2</sub> (Phen)Pt···PF <sub>3</sub>  | Pt···P  | 0.013 | 0.027 | -0.007 | 0.007 | -0.009 |
| Br <sub>2</sub> (Phen)Pt···AsF <sub>3</sub> | Pt···As | 0.022 | 0.036 | -0.012 | 0.011 | -0.953 |
| Br <sub>2</sub> (Phen)Pt···SbF <sub>3</sub> | Pt···Sb | 0.025 | 0.037 | -0.015 | 0.012 | -1.776 |
| Br <sub>2</sub> (Phen)Pt···SF <sub>2</sub>  | Pt···S  | 0.023 | 0.051 | -0.015 | 0.014 | -0.620 |
| Br <sub>2</sub> (Phen)Pt···SeF <sub>2</sub> | Pt···Se | 0.032 | 0.055 | -0.020 | 0.017 | -2.084 |
| Br <sub>2</sub> (Phen)Pt···TeF <sub>2</sub> | Pt···Te | 0.033 | 0.048 | -0.021 | 0.017 | -2.906 |
| Br <sub>2</sub> (Phen)Pt···ClF              | Pt···Cl | 0.050 | 0.099 | -0.039 | 0.032 | -4.541 |
| Br <sub>2</sub> (Phen)Pt···BrF              | Pt···Br | 0.045 | 0.078 | -0.033 | 0.026 | -4.164 |
| Br <sub>2</sub> (Phen)Pt···IF               | Pt···I  | 0.038 | 0.060 | -0.026 | 0.021 | -3.498 |
| I <sub>2</sub> (Phen)Pt···PF <sub>3</sub>   | Pt···P  | 0.012 | 0.026 | -0.006 | 0.006 | 0.056  |
| I <sub>2</sub> (Phen)Pt···AsF <sub>3</sub>  | Pt···As | 0.020 | 0.035 | -0.011 | 0.010 | -0.760 |
| I <sub>2</sub> (Phen)Pt···SbF <sub>3</sub>  | Pt···Sb | 0.024 | 0.035 | -0.014 | 0.011 | -1.551 |
| I <sub>2</sub> (Phen)Pt···SF <sub>2</sub>   | Pt···S  | 0.022 | 0.049 | -0.014 | 0.013 | -0.510 |
| I <sub>2</sub> (Phen)Pt···SeF <sub>2</sub>  | Pt···Se | 0.031 | 0.054 | -0.020 | 0.017 | -1.995 |
| I <sub>2</sub> (Phen)Pt···TeF <sub>2</sub>  | Pt···Te | 0.032 | 0.048 | -0.021 | 0.016 | -2.821 |
| I <sub>2</sub> (Phen)Pt···ClF               | Pt···Cl | 0.050 | 0.099 | -0.039 | 0.032 | -4.651 |
| I <sub>2</sub> (Phen)Pt···BrF               | Pt···Br | 0.045 | 0.077 | -0.033 | 0.026 | -4.176 |
| I <sub>2</sub> (Phen)Pt···IF                | Pt···I  | 0.038 | 0.060 | -0.026 | 0.020 | -3.465 |

**Table S5.** QTAIM molecular graphs presenting the Bond Critical Points (BCPs) (green dots) in the studied complexes. Solid and dashed lines identified bond paths. Electron density ( $\rho$ ) value is given in a.u.

| Complex                                     | QTAIM molecular graph                                                                |
|---------------------------------------------|--------------------------------------------------------------------------------------|
| Cl <sub>2</sub> (Phen)Pd···PF <sub>3</sub>  | 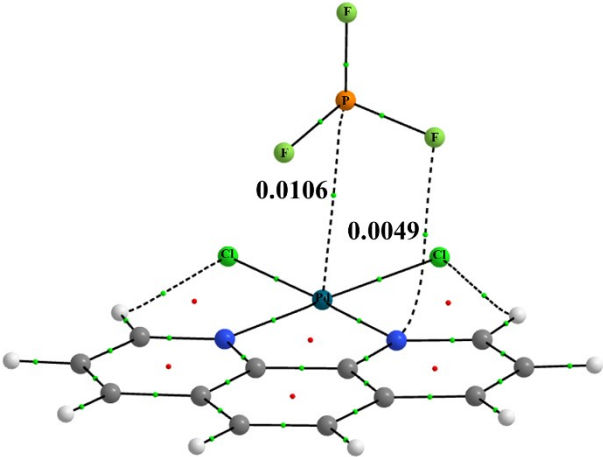   |
| Cl <sub>2</sub> (Phen)Pd···AsF <sub>3</sub> |   |
| Cl <sub>2</sub> (Phen)Pd···SbF <sub>3</sub> |  |

|                                                                         |                                                                                                                                                                                                                                                                                                                                                                                  |
|-------------------------------------------------------------------------|----------------------------------------------------------------------------------------------------------------------------------------------------------------------------------------------------------------------------------------------------------------------------------------------------------------------------------------------------------------------------------|
| <p><math>\text{Cl}_2(\text{Phen})\text{Pd}\cdots\text{SF}_2</math></p>  | 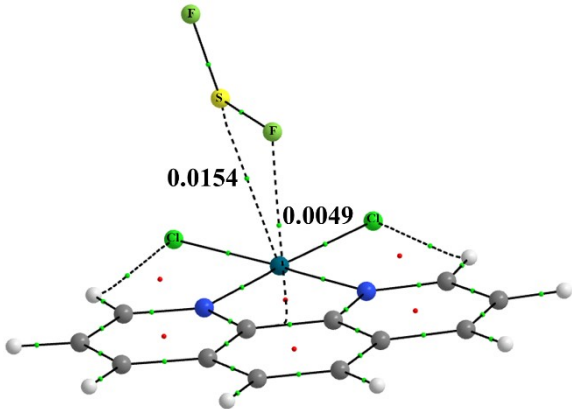 <p>ORTEP diagram showing the interaction between the Pd atom and the SF<sub>2</sub> molecule. The Pd-S distance is 0.0154 Å and the Pd-Cl distance is 0.0049 Å. The phenanthroline ligand is shown as a 3D ball-and-stick model with thermal ellipsoids at the 50% probability level.</p>     |
| <p><math>\text{Cl}_2(\text{Phen})\text{Pd}\cdots\text{SeF}_2</math></p> |  <p>ORTEP diagram showing the interaction between the Pd atom and the SeF<sub>2</sub> molecule. The Pd-Se distance is 0.0222 Å. The phenanthroline ligand is shown as a 3D ball-and-stick model with thermal ellipsoids at the 50% probability level.</p>                                     |
| <p><math>\text{Cl}_2(\text{Phen})\text{Pd}\cdots\text{TeF}_2</math></p> |  <p>ORTEP diagram showing the interaction between the Pd atom and the TeF<sub>2</sub> molecule. The Pd-Te distance is 0.0227 Å and the Pd-Cl distance is 0.0070 Å. The phenanthroline ligand is shown as a 3D ball-and-stick model with thermal ellipsoids at the 50% probability level.</p> |

|                                                                       |                                                                                      |
|-----------------------------------------------------------------------|--------------------------------------------------------------------------------------|
| <p><math>\text{Cl}_2(\text{Phen})\text{Pd}\cdots\text{ClF}</math></p> | 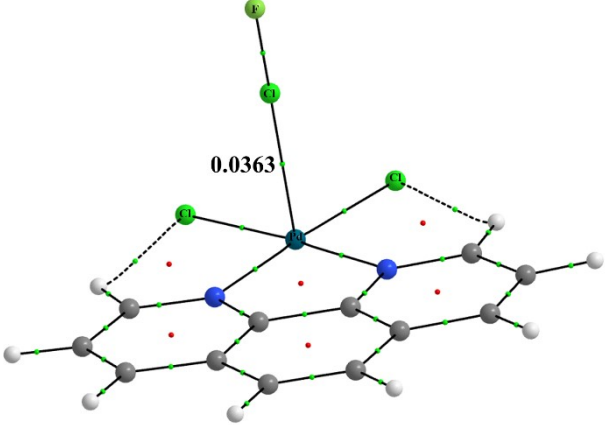   |
| <p><math>\text{Cl}_2(\text{Phen})\text{Pd}\cdots\text{BrF}</math></p> |   |
| <p><math>\text{Cl}_2(\text{Phen})\text{Pd}\cdots\text{IF}</math></p>  |  |

|                                                                         |                                                                                                                                                                                                                                                                                                                                                                                                                                                            |
|-------------------------------------------------------------------------|------------------------------------------------------------------------------------------------------------------------------------------------------------------------------------------------------------------------------------------------------------------------------------------------------------------------------------------------------------------------------------------------------------------------------------------------------------|
| <p><math>\text{Br}_2(\text{Phen})\text{Pd}\cdots\text{PF}_3</math></p>  | 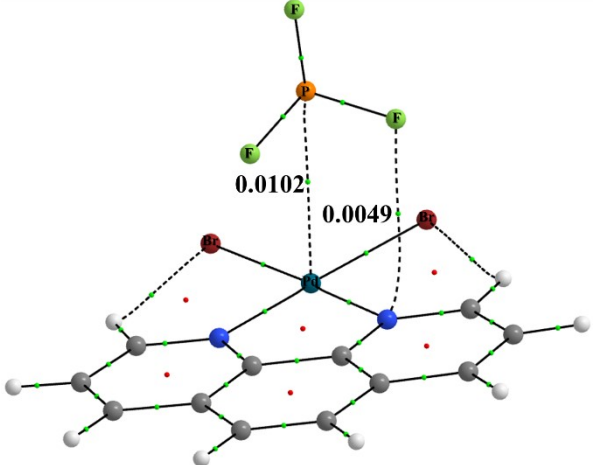 <p>ORTEP diagram showing the interaction between the Pd atom and the PF<sub>3</sub> group. The Pd atom is coordinated to two bromine atoms (red spheres) and two phenyl rings (grey and white spheres). The PF<sub>3</sub> group is shown above the Pd atom. The Pd-F bond length is 0.0102 Å, and the Pd...F interaction distance is 0.0049 Å.</p>                     |
| <p><math>\text{Br}_2(\text{Phen})\text{Pd}\cdots\text{AsF}_3</math></p> |  <p>ORTEP diagram showing the interaction between the Pd atom and the AsF<sub>3</sub> group. The Pd atom is coordinated to two bromine atoms (red spheres) and two phenyl rings (grey and white spheres). The AsF<sub>3</sub> group is shown above the Pd atom. The Pd-As bond length is 0.0156 Å, and the Pd...F interaction distance is 0.0062 Å.</p>                 |
| <p><math>\text{Br}_2(\text{Phen})\text{Pd}\cdots\text{SbF}_3</math></p> |  <p>ORTEP diagram showing the interaction between the Pd atom and the SbF<sub>3</sub> group. The Pd atom is coordinated to two bromine atoms (red spheres) and two phenyl rings (grey and white spheres). The SbF<sub>3</sub> group is shown above the Pd atom. The Pd-Sb bond length is 0.0186 Å, and the Pd...F interaction distances are 0.0072 Å and 0.0073 Å.</p> |

|                                                                         |                                                                                      |
|-------------------------------------------------------------------------|--------------------------------------------------------------------------------------|
| <p><math>\text{Br}_2(\text{Phen})\text{Pd}\cdots\text{SF}_2</math></p>  | 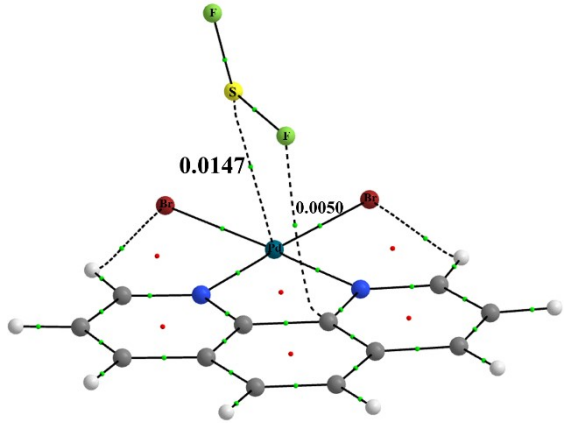   |
| <p><math>\text{Br}_2(\text{Phen})\text{Pd}\cdots\text{SeF}_2</math></p> |   |
| <p><math>\text{Br}_2(\text{Phen})\text{Pd}\cdots\text{TeF}_2</math></p> |  |

|                                                                       |                                                                                     |
|-----------------------------------------------------------------------|-------------------------------------------------------------------------------------|
| <p><math>\text{Br}_2(\text{Phen})\text{Pd}\cdots\text{ClF}</math></p> | 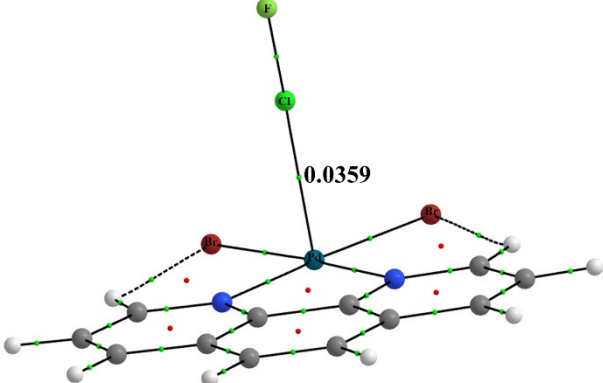  |
| <p><math>\text{Br}_2(\text{Phen})\text{Pd}\cdots\text{BrF}</math></p> |   |
| <p><math>\text{Br}_2(\text{Phen})\text{Pd}\cdots\text{IF}</math></p>  |  |



|                            |                                                                                      |
|----------------------------|--------------------------------------------------------------------------------------|
| $I_2(Phen)Pd \cdots PF_3$  | 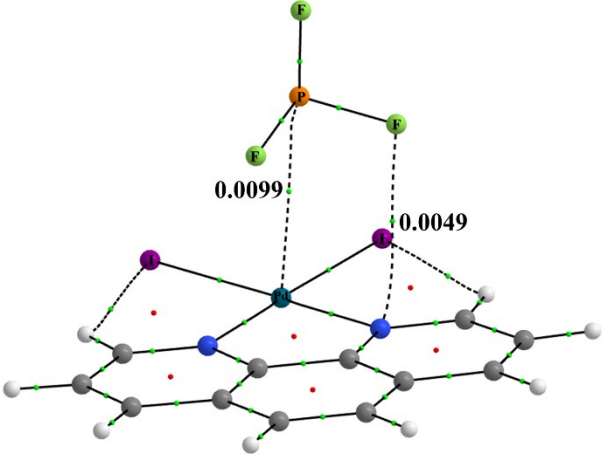   |
| $I_2(Phen)Pd \cdots AsF_3$ |   |
| $I_2(Phen)Pd \cdots SbF_3$ |  |

|                            |                                                                                      |
|----------------------------|--------------------------------------------------------------------------------------|
| $I_2(Phen)Pd \cdots SF_2$  | 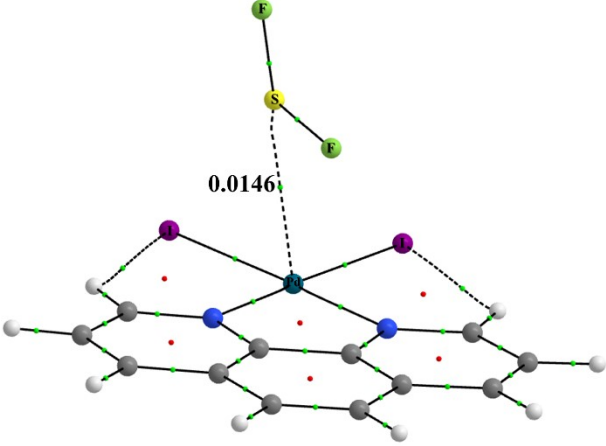   |
| $I_2(Phen)Pd \cdots SeF_2$ |   |
| $I_2(Phen)Pd \cdots TeF_2$ |  |

|                                            |                                                                                                    |
|--------------------------------------------|----------------------------------------------------------------------------------------------------|
| <p><math>I_2(Phen)Pd \cdots ClF</math></p> | 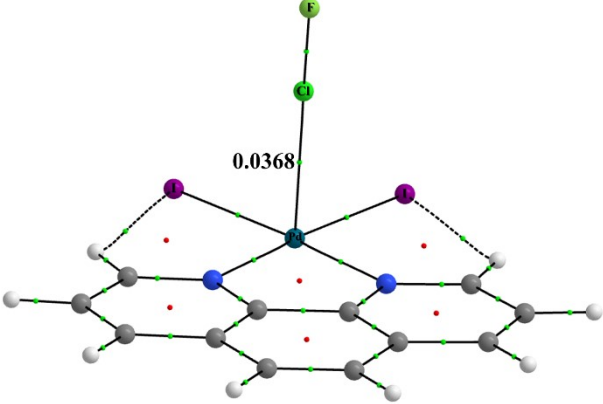 <p>0.0368</p>   |
| <p><math>I_2(Phen)Pd \cdots BrF</math></p> |  <p>0.0348</p>  |
| <p><math>I_2(Phen)Pd \cdots IF</math></p>  |  <p>0.0295</p> |

|                                                                         |                                                                                      |
|-------------------------------------------------------------------------|--------------------------------------------------------------------------------------|
| <p><math>\text{Cl}_2(\text{Phen})\text{Pt}\cdots\text{PF}_3</math></p>  | 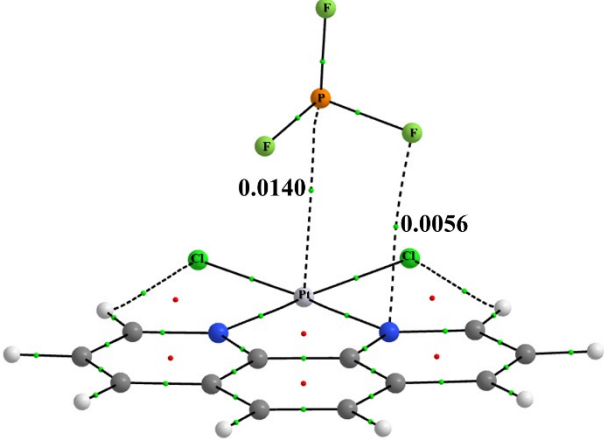   |
| <p><math>\text{Cl}_2(\text{Phen})\text{Pt}\cdots\text{AsF}_3</math></p> |   |
| <p><math>\text{Cl}_2(\text{Phen})\text{Pt}\cdots\text{SbF}_3</math></p> |  |

|                                                                         |                                                                                                                                                                                                                                                                                                                                                                                                                                                                                                                                                    |
|-------------------------------------------------------------------------|----------------------------------------------------------------------------------------------------------------------------------------------------------------------------------------------------------------------------------------------------------------------------------------------------------------------------------------------------------------------------------------------------------------------------------------------------------------------------------------------------------------------------------------------------|
| <p><math>\text{Cl}_2(\text{Phen})\text{Pt}\cdots\text{SF}_2</math></p>  | 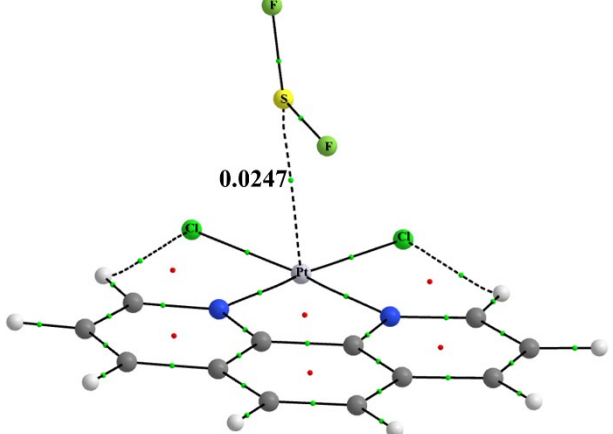 <p>ORTEP diagram of <math>\text{Cl}_2(\text{Phen})\text{Pt}\cdots\text{SF}_2</math>. The structure shows a platinum atom coordinated to two chlorine atoms and two phenyl rings. A sulfur atom is coordinated to the platinum atom, with a bond length of 0.0247 Å. The sulfur atom is also bonded to two fluorine atoms. The phenyl rings are shown as thermal ellipsoids at the 50% probability level.</p>                                                    |
| <p><math>\text{Cl}_2(\text{Phen})\text{Pt}\cdots\text{SeF}_2</math></p> |  <p>ORTEP diagram of <math>\text{Cl}_2(\text{Phen})\text{Pt}\cdots\text{SeF}_2</math>. The structure shows a platinum atom coordinated to two chlorine atoms and two phenyl rings. A selenium atom is coordinated to the platinum atom, with a bond length of 0.0328 Å. The selenium atom is also bonded to two fluorine atoms. One of the Pt-F bond lengths is 0.0080 Å. The phenyl rings are shown as thermal ellipsoids at the 50% probability level.</p>    |
| <p><math>\text{Cl}_2(\text{Phen})\text{Pt}\cdots\text{TeF}_2</math></p> |  <p>ORTEP diagram of <math>\text{Cl}_2(\text{Phen})\text{Pt}\cdots\text{TeF}_2</math>. The structure shows a platinum atom coordinated to two chlorine atoms and two phenyl rings. A tellurium atom is coordinated to the platinum atom, with a bond length of 0.0336 Å. The tellurium atom is also bonded to two fluorine atoms. One of the Pt-F bond lengths is 0.0091 Å. The phenyl rings are shown as thermal ellipsoids at the 50% probability level.</p> |

|                                                                       |                                                                                      |
|-----------------------------------------------------------------------|--------------------------------------------------------------------------------------|
| <p><math>\text{Cl}_2(\text{Phen})\text{Pt}\cdots\text{ClF}</math></p> | 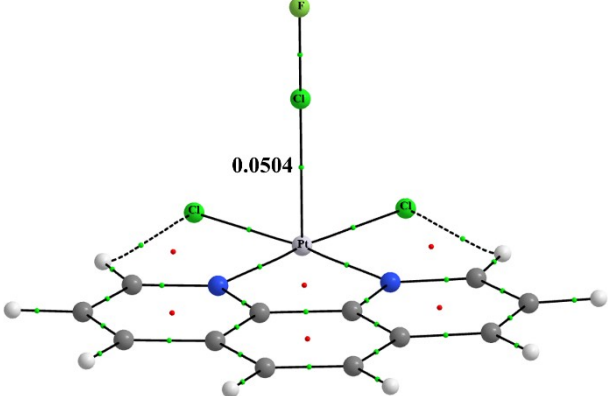   |
| <p><math>\text{Cl}_2(\text{Phen})\text{Pt}\cdots\text{BrF}</math></p> |   |
| <p><math>\text{Cl}_2(\text{Phen})\text{Pt}\cdots\text{IF}</math></p>  |  |

|                                                                         |                                                                                      |
|-------------------------------------------------------------------------|--------------------------------------------------------------------------------------|
| <p><math>\text{Br}_2(\text{Phen})\text{Pt}\cdots\text{PF}_3</math></p>  | 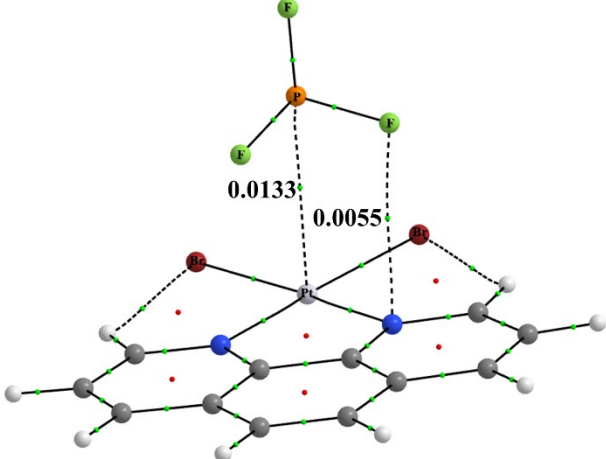   |
| <p><math>\text{Br}_2(\text{Phen})\text{Pt}\cdots\text{AsF}_3</math></p> |   |
| <p><math>\text{Br}_2(\text{Phen})\text{Pt}\cdots\text{SbF}_3</math></p> |  |

|                                                                         |                                                                                      |
|-------------------------------------------------------------------------|--------------------------------------------------------------------------------------|
| <p><math>\text{Br}_2(\text{Phen})\text{Pt}\cdots\text{SF}_2</math></p>  | 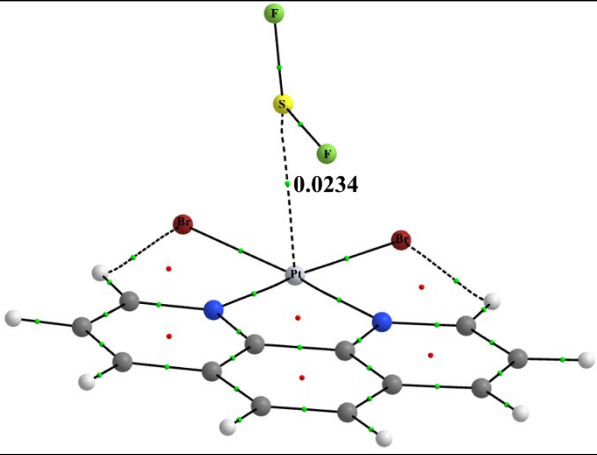   |
| <p><math>\text{Br}_2(\text{Phen})\text{Pt}\cdots\text{SeF}_2</math></p> |   |
| <p><math>\text{Br}_2(\text{Phen})\text{Pt}\cdots\text{TeF}_2</math></p> |  |



|                                                                       |                                                                                      |
|-----------------------------------------------------------------------|--------------------------------------------------------------------------------------|
| <p><math>\text{Br}_2(\text{Phen})\text{Pt}\cdots\text{ClF}</math></p> | 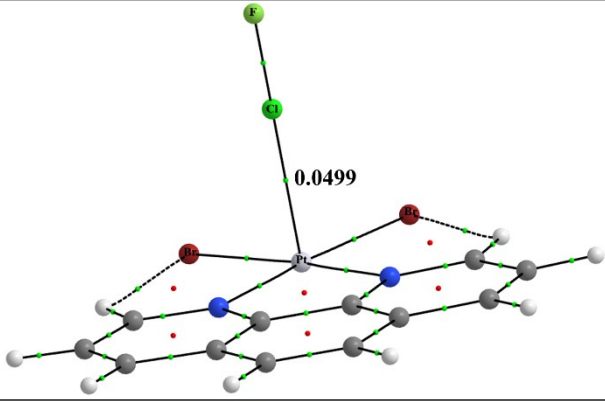   |
| <p><math>\text{Br}_2(\text{Phen})\text{Pt}\cdots\text{BrF}</math></p> |   |
| <p><math>\text{Br}_2(\text{Phen})\text{Pt}\cdots\text{IF}</math></p>  |  |

|                            |                                                                                      |
|----------------------------|--------------------------------------------------------------------------------------|
| $I_2(Phen)Pt \cdots PF_3$  | 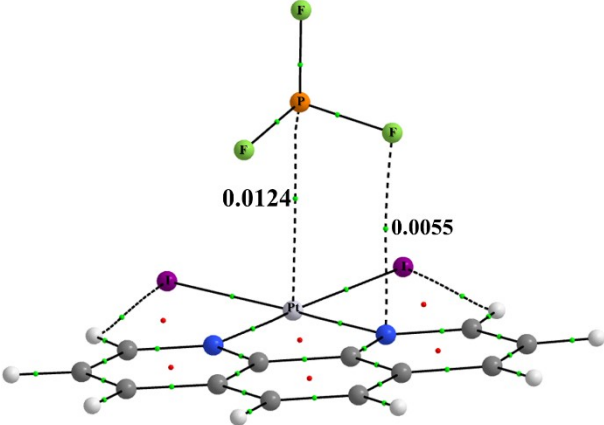   |
| $I_2(Phen)Pt \cdots AsF_3$ |   |
| $I_2(Phen)Pt \cdots SbF_3$ |  |

|                                              |                                                                                      |
|----------------------------------------------|--------------------------------------------------------------------------------------|
| <p><math>I_2(Phen)Pt \cdots SF_2</math></p>  | 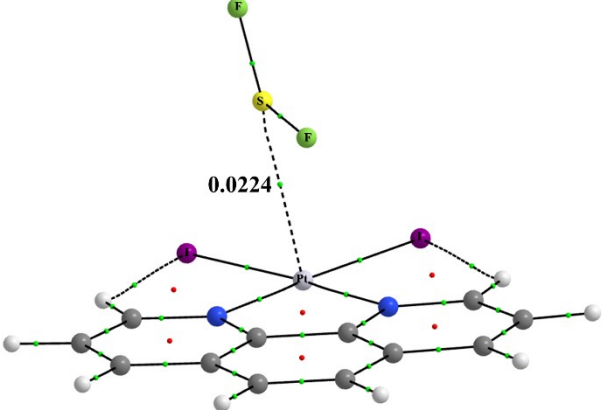   |
| <p><math>I_2(Phen)Pt \cdots SeF_2</math></p> |   |
| <p><math>I_2(Phen)Pt \cdots TeF_2</math></p> |  |
| <p><math>I_2(Phen)Pt \cdots ClF</math></p>   |  |

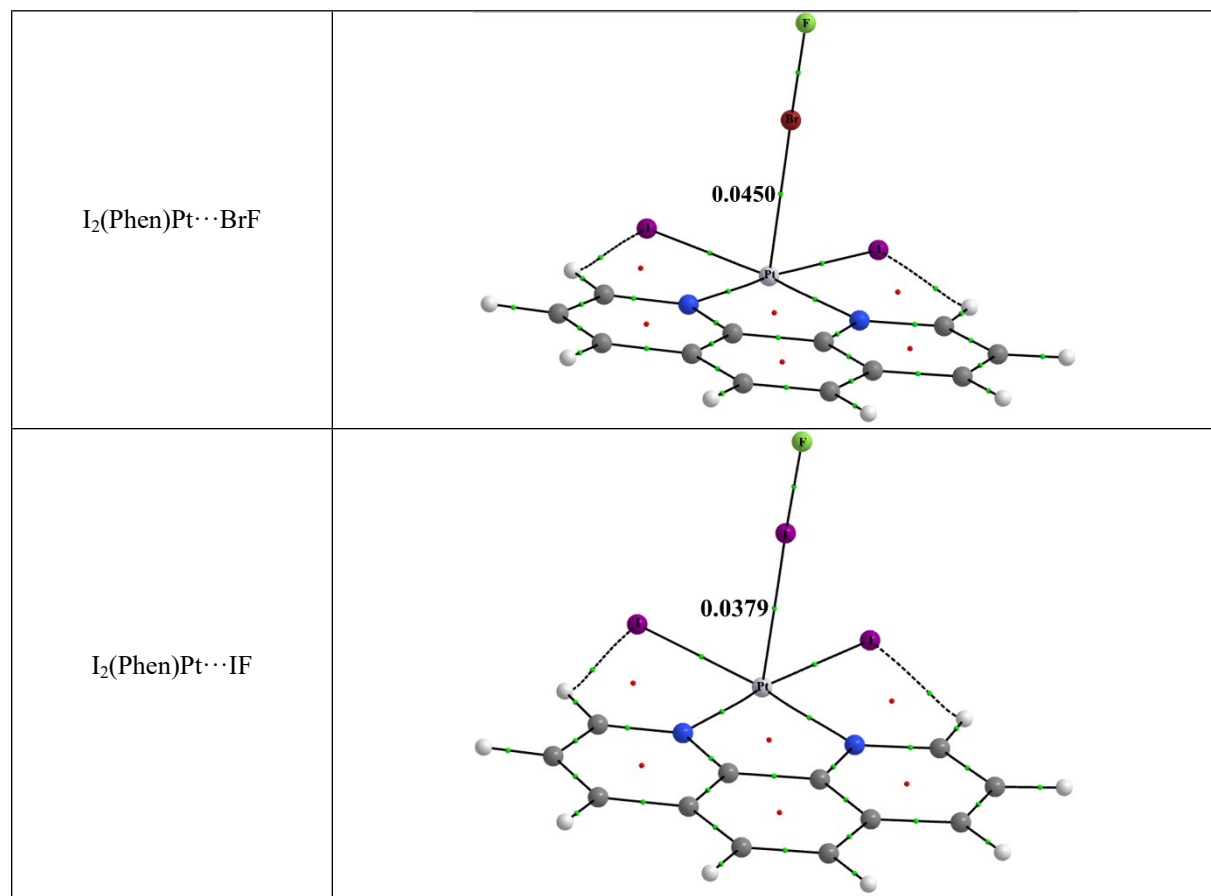



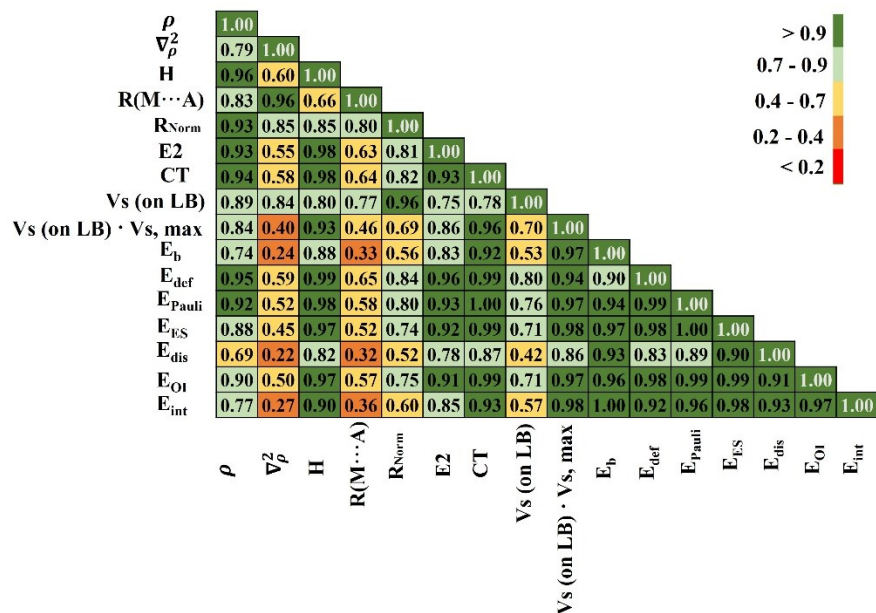

**Figure S8.** Correlation coefficients of selected features obtained for all complexes containing a chalcogen bond. The absolute values of the correlation matrix are presented on a five-point scale: high values are green and low values are red.

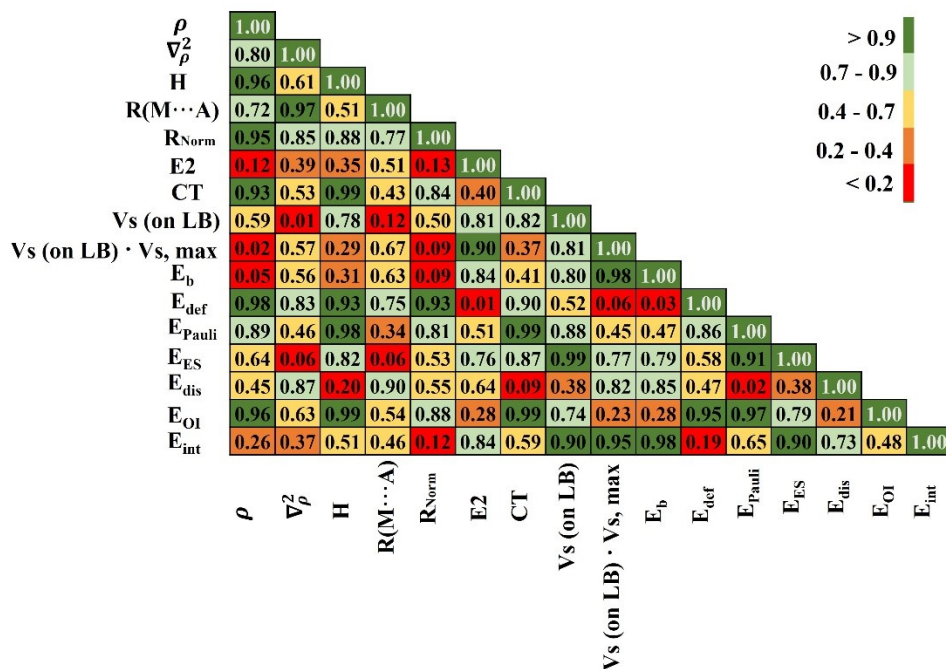

**Figure S9.** Correlation coefficients of selected features obtained for all complexes containing a halogen bond. The absolute values of the correlation matrix are presented on a five-point scale: high values are green and low values are red.

**Table S6.** XYZ coordinates of the optimized geometries for the studied complexes.

|                                                       |                                                                                                                                                                                                                                                                                                                                                                                                                                                                                                                                                                                                                                                                                                                                                                                                                                                                                                                                                                                                                                                                                                                                                               |
|-------------------------------------------------------|---------------------------------------------------------------------------------------------------------------------------------------------------------------------------------------------------------------------------------------------------------------------------------------------------------------------------------------------------------------------------------------------------------------------------------------------------------------------------------------------------------------------------------------------------------------------------------------------------------------------------------------------------------------------------------------------------------------------------------------------------------------------------------------------------------------------------------------------------------------------------------------------------------------------------------------------------------------------------------------------------------------------------------------------------------------------------------------------------------------------------------------------------------------|
| $\text{Cl}_2(\text{Phen})\text{Pd}\cdots\text{PF}_3$  | N 0.79086500 2.39455100 5.94653800<br>N -0.60822900 3.76369300 4.15498600<br>C -1.26889300 4.43335300 3.23063300<br>C -0.29735900 3.06196000 6.39421800<br>C 1.52118500 1.70576200 6.80185300<br>C -0.69043000 3.05560200 7.73981800<br>C 1.19862300 1.64333700 8.16158600<br>H 1.83070000 1.06523200 8.82312400<br>C -2.41443200 5.17596000 3.53714700<br>H -2.92097400 5.70858500 2.74265100<br>C 0.09922900 2.31424000 8.63370800<br>H -0.16539500 2.28220400 9.68490100<br>C -1.04698400 3.79568400 5.43412900<br>C -2.18352400 4.51550200 5.82868000<br>H -2.15027100 3.78781500 9.16100300<br>C -2.56622700 4.49405000 7.20387300<br>H -3.44514800 5.05345500 7.50382900<br>C -2.87326700 5.22073200 4.82922600<br>H -3.75736500 5.79293800 5.08813600<br>H 2.38580100 1.20558700 6.37873600<br>H -0.85906000 4.36990100 2.22799100<br>Cl 1.28587000 3.13289500 1.73718800<br>Cl 3.01911900 1.45818900 3.94566700<br>P 3.14581400 5.18892000 5.03453700<br>F 3.90497500 6.46666200 5.57286400<br>F 1.68308800 5.70394000 5.36695300<br>F 3.32693100 4.31209100 6.33439700<br>C -1.85122700 3.79515300 8.11891900<br>Pd 1.10626100 2.66904800 3.94463200 |
| $\text{Cl}_2(\text{Phen})\text{Pd}\cdots\text{AsF}_3$ | N 0.77977300 2.32976200 6.01509700<br>N -0.54937400 3.76923800 4.22437300<br>C -1.16709300 4.48179100 3.30347600<br>C -0.30917600 3.00310000 6.45103600<br>C 1.48247300 1.61576000 6.87171400<br>C -0.73457200 2.97242300 7.78622300<br>C 1.12627300 1.52721400 8.22160800<br>H 1.73611600 0.92806500 8.88521000<br>C -2.30590400 5.23822300 3.60007100<br>H -2.77694500 5.80669100 2.80871500<br>C 0.02375600 2.20085100 8.68166800<br>H -0.26599100 2.14985900 9.72543000<br>C -1.02130800 3.77373500 5.49182200<br>C -2.15294200 4.50601500 5.87634200<br>H -2.21615000 3.69587000 9.18900300<br>C -2.57123800 4.45653700 7.24023000<br>H -3.44644600 5.02562600 7.53258200<br>C -2.80013300 5.25387900 4.87934400<br>H -3.67826200 5.83823600 5.13116600<br>H 2.35308900 1.11622900 6.46126600<br>H -0.72734300 4.44800700 2.31275000<br>Cl 1.46861500 3.26655000 1.87227800<br>Cl 3.09813600 1.49058700 4.06984600<br>As 3.11088300 5.15779700 4.66511800                                                                                                                                                                                                |

|                                             |                                                                                                                                                                                                                                                                                                                                                                                                                                                                                                                                                                                                                                                                                                                                                                                                                                                                                                                                                                                                                                                                                                                                                                                                                                |
|---------------------------------------------|--------------------------------------------------------------------------------------------------------------------------------------------------------------------------------------------------------------------------------------------------------------------------------------------------------------------------------------------------------------------------------------------------------------------------------------------------------------------------------------------------------------------------------------------------------------------------------------------------------------------------------------------------------------------------------------------------------------------------------------------------------------------------------------------------------------------------------------------------------------------------------------------------------------------------------------------------------------------------------------------------------------------------------------------------------------------------------------------------------------------------------------------------------------------------------------------------------------------------------|
|                                             | <p>F 3.98657200 6.56524400 5.16705400<br/> F 1.58498500 5.97706300 4.62371600<br/> F 2.89468900 4.57096100 6.27977100<br/> C -1.89193500 3.72226600 8.15483100<br/> Pd 1.16912700 2.67946200 4.04018400</p>                                                                                                                                                                                                                                                                                                                                                                                                                                                                                                                                                                                                                                                                                                                                                                                                                                                                                                                                                                                                                    |
| Cl <sub>2</sub> (Phen)Pd···SbF <sub>3</sub> | <p>Pd 1.17807200 2.64046700 4.06511800<br/> N 0.75831700 2.27483700 6.02960100<br/> N -0.52672800 3.75105600 4.23653300<br/> C -1.11475900 4.48916500 3.31700000<br/> C -0.31595700 2.97308800 6.46157200<br/> C 1.44070900 1.54335900 6.88713100<br/> C -0.74654700 2.95113800 7.79496200<br/> C 1.07648200 1.45997600 8.23511200<br/> H 1.66941000 0.84563900 8.90005100<br/> C -2.23239600 5.27700100 3.61125900<br/> H -2.67943600 5.86607300 2.82121900<br/> C -0.01083200 2.15967000 8.69172300<br/> H -0.30492700 2.11514900 9.73454600<br/> C -1.00352100 3.76397000 5.50186400<br/> C -2.11426800 4.52799200 5.88410100<br/> H -2.21198300 3.71239400 9.19444800<br/> C -2.53900200 4.48681500 7.24615700<br/> H -3.39789000 5.08092800 7.53698100<br/> C -2.73320300 5.29983500 4.88745000<br/> H -3.59357500 5.91045300 5.13815100<br/> H 2.30318100 1.02623400 6.48238300<br/> H -0.66881600 4.45483700 2.32975500<br/> Cl 1.52968300 3.25078700 1.90727700<br/> Cl 3.11372200 1.45815600 4.11496900<br/> Sb 3.12214100 5.14592500 4.54703400<br/> F 3.95843900 6.73711500 5.19049600<br/> F 1.45153700 6.04009200 4.33480700<br/> F 2.67605300 4.59353600 6.31895200<br/> C -1.88422900 3.73134200 8.16127800</p> |
| Cl <sub>2</sub> (Phen)Pd···SF <sub>2</sub>  | <p>N 0.91089200 2.32354200 6.01968800<br/> N -0.39567400 3.87389300 4.30725700<br/> C -1.00216300 4.64226300 3.42338300<br/> C -0.14145300 3.02330100 6.50128100<br/> C 1.59879500 1.54937500 6.83601500<br/> C -0.54251600 2.96213200 7.84304700<br/> C 1.26607800 1.42887400 8.18972700<br/> H 1.86200700 0.78100500 8.81945000<br/> C -2.10383500 5.43190100 3.76931900<br/> H -2.56782800 6.04535000 3.00790700<br/> C 0.20098800 2.13000500 8.69563300<br/> H -0.07147400 2.05243200 9.74245100<br/> C -0.84187700 3.85360300 5.58367500<br/> C -1.93633900 4.61523400 6.01613200<br/> H -1.96916700 3.69099000 9.29936400<br/> C -2.33027700 4.53376100 7.38592500<br/> H -3.17769100 5.12433900 7.71528900<br/> C -2.57259000 5.42174700 5.05865700<br/> H -3.42283400 6.02962300 5.34785700<br/> H 2.43328600 1.02232000 6.38545300<br/> H -0.58503400 4.61995900 2.42222000<br/> Cl 1.45559000 3.23516600 1.84824300</p>                                                                                                                                                                                                                                                                                              |



|                                             |                                                                                                                                                                                                                                                                                                                                                                                                                                                                                                                                                                                                                                                                                                                                                                                                                                                                                                                                                                                                                                                                                                                          |
|---------------------------------------------|--------------------------------------------------------------------------------------------------------------------------------------------------------------------------------------------------------------------------------------------------------------------------------------------------------------------------------------------------------------------------------------------------------------------------------------------------------------------------------------------------------------------------------------------------------------------------------------------------------------------------------------------------------------------------------------------------------------------------------------------------------------------------------------------------------------------------------------------------------------------------------------------------------------------------------------------------------------------------------------------------------------------------------------------------------------------------------------------------------------------------|
|                                             | Cl 3.03725500 1.30962300 3.95066000<br>F 3.28819400 6.93547600 4.65674000<br>F 2.01132800 5.33954000 5.91264100<br>C -1.66289900 3.74232600 8.26064700<br>Pd 1.24131600 2.67779800 4.03232400<br>S 2.61350700 5.49653400 4.42876500                                                                                                                                                                                                                                                                                                                                                                                                                                                                                                                                                                                                                                                                                                                                                                                                                                                                                      |
| Cl <sub>2</sub> (Phen)Pd···SeF <sub>2</sub> | N 0.90827900 2.33865600 6.01140500<br>N -0.41607200 3.87721900 4.29953600<br>C -1.02775500 4.64237800 3.41673900<br>C -0.14813400 3.03091400 6.49366400<br>C 1.60953900 1.57727600 6.82759700<br>C -0.54165800 2.97264300 7.83730900<br>C 1.28507800 1.46069600 8.18359000<br>H 1.89216300 0.82412700 8.81407100<br>C -2.13377100 5.42461400 3.76486800<br>H -2.60265100 6.03601800 3.00490200<br>C 0.21499800 2.15305000 8.69045200<br>H -0.05056900 2.07946900 9.73930900<br>C -0.85791000 3.85369700 5.57709800<br>C -1.95523800 4.60936100 6.01188200<br>H -1.96631500 3.69628500 9.29801000<br>C -2.34322900 4.52908700 7.38336500<br>H -3.19277500 5.11540200 7.71467500<br>C -2.59870800 5.41136600 5.05549500<br>H -3.45101200 6.01520300 5.34702000<br>H 2.44870500 1.05807400 6.37719700<br>H -0.61189500 4.62583700 2.41519600<br>Cl 1.45881800 3.26571100 1.84225700<br>Cl 3.04298200 1.35098800 3.93871100<br>F 3.45611800 6.88954600 4.75312100<br>F 1.94116400 5.24368300 5.98717900<br>C -1.66605300 3.74556900 8.25748600<br>Se 2.66487500 5.36398000 4.39242300<br>Pd 1.23660700 2.70126400 4.02519300 |
| Cl <sub>2</sub> (Phen)Pd···TeF <sub>2</sub> | N 0.89147900 2.30863800 6.01552400<br>N -0.42083700 3.85791900 4.30362800<br>C -1.02591600 4.62853700 3.42067400<br>C -0.15578500 3.01378800 6.49849000<br>C 1.58985000 1.54533000 6.83215300<br>C -0.54469300 2.96467000 7.84356200<br>C 1.27017400 1.43847900 8.18995000<br>H 1.87483100 0.80031200 8.82107800<br>C -2.12650500 5.41837300 3.76834200<br>H -2.59047300 6.03334200 3.00835300<br>C 0.20831300 2.14269100 8.69748900<br>H -0.05319200 2.07704900 9.74787600<br>C -0.86064800 3.83961800 5.58176600<br>C -1.95026100 4.60570600 6.01677400<br>H -1.95674100 3.70750700 9.30672400<br>C -2.33445100 4.53434200 7.38965000<br>H -3.17743900 5.12973500 7.72140500<br>C -2.58905400 5.41066400 5.05964900<br>H -3.43524500 6.02272600 5.35175200<br>H 2.42292500 1.01661800 6.38200600<br>H -0.61054600 4.61235400 2.41935000<br>Cl 1.50657600 3.29087600 1.86598400                                                                                                                                                                                                                                         |

|                                |                                                                                                                                                                                                                                                                                                                                                                                                                                                                                                                                                                                                                                                                                                                                                                                                                                                                                                                                                                                                                                                                                     |
|--------------------------------|-------------------------------------------------------------------------------------------------------------------------------------------------------------------------------------------------------------------------------------------------------------------------------------------------------------------------------------------------------------------------------------------------------------------------------------------------------------------------------------------------------------------------------------------------------------------------------------------------------------------------------------------------------------------------------------------------------------------------------------------------------------------------------------------------------------------------------------------------------------------------------------------------------------------------------------------------------------------------------------------------------------------------------------------------------------------------------------|
|                                | Cl 3.01942900 1.30656000 3.94468200<br>F 3.52129800 7.07749400 4.79525000<br>F 1.87254600 5.23224100 5.95427100<br>C -1.66055400 3.74919100 8.26474100<br>Te 2.68001100 5.44872500 4.22402000<br>Pd 1.23049100 2.67862800 4.03460600                                                                                                                                                                                                                                                                                                                                                                                                                                                                                                                                                                                                                                                                                                                                                                                                                                                |
| Cl <sub>2</sub> (Phen)Pd···ClF | N 0.43899500 1.63808000 5.82734200<br>N -0.87753800 3.04590300 3.99395100<br>C -1.48548300 3.74248900 3.05498100<br>C -0.69599100 2.25833400 6.22064700<br>C 1.13394300 0.94060200 6.70318500<br>C -1.17931900 2.18756000 7.53461200<br>C 0.72254900 0.81683200 8.03491100<br>H 1.32698300 0.23392300 8.71766800<br>C -2.66822700 4.44466800 3.31208000<br>H -3.13066400 5.00336700 2.50878100<br>C -0.42807900 1.43557800 8.45281300<br>H -0.76224600 1.35523400 9.48136400<br>C -1.39986000 3.01125800 5.24035100<br>C -2.57958700 3.68588900 5.58425600<br>C -2.38483000 2.87883800 7.86116600<br>H -2.75364400 2.82082400 8.87895100<br>C -3.05537800 3.59646000 6.92715500<br>H -3.96803300 4.12048900 7.18740600<br>C -3.21621000 4.41901000 4.56926000<br>H -4.13013800 4.95938100 4.79010800<br>H 2.03919700 0.48043300 6.32140300<br>H -1.00427400 3.73553900 2.08266900<br>Cl 1.16696000 2.49497500 1.67678400<br>Cl 2.77464900 0.77735100 3.91506600<br>F 2.53264100 5.71229600 5.51977100<br>Pd 0.88350600 2.00300300 3.85846500<br>Cl 1.97850000 4.28776700 4.82577500 |
| Cl <sub>2</sub> (Phen)Pd···BrF | N 0.41932300 1.60975100 5.81938800<br>N -0.89722300 3.01857300 3.98587300<br>C -1.50310400 3.71776200 3.04756300<br>C -0.71048400 2.23809500 6.21470300<br>C 1.11618500 0.91471100 6.69557400<br>C -1.18668000 2.17780800 7.53166200<br>C 0.71139700 0.80085000 8.03011700<br>H 1.31714700 0.21986800 8.71329700<br>C -2.67937400 4.42949100 3.30760700<br>H -3.14045700 4.99015700 2.50494500<br>C -0.43394400 1.42776000 8.45026900<br>H -0.76239100 1.35602200 9.48127900<br>C -1.41418900 2.99113300 5.23466800<br>C -2.58685400 3.67617500 5.58164200<br>C -2.38587300 2.87851100 7.86120100<br>H -2.74919000 2.82849700 8.88135700<br>C -3.05646700 3.59615200 6.92726200<br>H -3.96374100 4.12824800 7.18983900<br>C -3.22201200 4.41139000 4.56720100<br>H -4.13029900 4.96011800 4.79062100<br>H 2.01809300 0.44911600 6.31278700<br>H -1.02558500 3.70639000 2.07360700<br>Cl 1.14446600 2.45798000 1.66739400                                                                                                                                                            |

|                               |                                                                                                                                                                                                                                                                                                                                                                                                                                                                                                                                                                                                                                                                                                                                                                                                                                                                                                                                                                                                                                                                                    |
|-------------------------------|------------------------------------------------------------------------------------------------------------------------------------------------------------------------------------------------------------------------------------------------------------------------------------------------------------------------------------------------------------------------------------------------------------------------------------------------------------------------------------------------------------------------------------------------------------------------------------------------------------------------------------------------------------------------------------------------------------------------------------------------------------------------------------------------------------------------------------------------------------------------------------------------------------------------------------------------------------------------------------------------------------------------------------------------------------------------------------|
|                               | Cl 2.74822400 0.74099100 3.90093000<br>Br 2.06118700 4.32629400 4.80006400<br>F 2.65570400 5.86099900 5.55821200<br>Pd 0.85946900 1.96717600 3.84726400                                                                                                                                                                                                                                                                                                                                                                                                                                                                                                                                                                                                                                                                                                                                                                                                                                                                                                                            |
| Cl <sub>2</sub> (Phen)Pd···IF | N 0.39818000 1.58429800 5.81490700<br>N -0.91994700 2.99264000 3.98236900<br>C -1.52601100 3.69309100 3.04489100<br>C -0.72763200 2.21857900 6.21295100<br>C 1.09631800 0.89026500 6.69114900<br>C -1.19738400 2.16620800 7.53251300<br>C 0.69754600 0.78389900 8.02798400<br>H 1.30448600 0.20377500 8.71081700<br>C -2.69696900 4.41218800 3.30797800<br>H -3.15795000 4.97366700 2.50584400<br>C -0.44312500 1.41738000 8.45086900<br>H -0.76653600 1.35193300 9.48387100<br>C -1.43213200 2.97131200 5.23351600<br>C -2.59915800 3.66426900 5.58354200<br>C -2.39158900 2.87389900 7.86499000<br>H -2.75016600 2.82980000 8.88707900<br>C -3.06296000 3.59141900 6.93153000<br>H -3.96609700 4.12931900 7.19647600<br>C -3.23431000 4.40057200 4.56988000<br>H -4.13820000 4.95549600 4.79574000<br>H 1.99514400 0.41996900 6.30716200<br>H -1.05267200 3.67784500 2.06907000<br>Cl 1.12187400 2.43091000 1.66267200<br>Cl 2.72691800 0.71814000 3.89316800<br>F 2.84389600 6.08589200 5.57714700<br>I 2.22022200 4.42747800 4.75644300<br>Pd 0.83160200 1.93350400 3.84000800 |

**Table S6 (Continuation).** XYZ coordinates of the optimized geometries for the studied complexes.

|                                             |                                                                                                                                                                                                                                                                                                                                                                                                                                                                                                                                                                                                                                                                                                                                                                                                                                                                                                                                                                                                                                                                                                                                                               |
|---------------------------------------------|---------------------------------------------------------------------------------------------------------------------------------------------------------------------------------------------------------------------------------------------------------------------------------------------------------------------------------------------------------------------------------------------------------------------------------------------------------------------------------------------------------------------------------------------------------------------------------------------------------------------------------------------------------------------------------------------------------------------------------------------------------------------------------------------------------------------------------------------------------------------------------------------------------------------------------------------------------------------------------------------------------------------------------------------------------------------------------------------------------------------------------------------------------------|
| Br <sub>2</sub> (Phen)Pd···PF <sub>3</sub>  | N 0.79372800 2.37891300 5.94678000<br>N -0.60668500 3.75933400 4.14886000<br>C -1.27262700 4.43219500 3.23045800<br>C -0.29048300 3.05560700 6.39090100<br>C 1.51536800 1.68775400 6.80774700<br>C -0.68384000 3.05517700 7.73761100<br>C 1.19256400 1.63087200 8.16733600<br>H 1.82015700 1.04940500 8.83022100<br>C -2.41351900 5.17961700 3.54113900<br>H -2.92153600 5.71336900 2.74832300<br>C 0.09844300 2.31155300 8.63561600<br>H -0.16872200 2.28582000 9.68635800<br>C -1.03857700 3.79259300 5.43052000<br>C -2.17113700 4.51825600 5.82970700<br>H -2.13484000 3.79656200 9.16225500<br>C -2.55176900 4.50220400 7.20501200<br>H -3.42720600 5.06715700 7.50475200<br>C -2.86429500 5.22650400 4.83519400<br>H -3.74441100 5.80197700 5.10042600<br>H 2.37768200 1.17693000 6.39214400<br>H -0.87271800 4.37068100 2.22349900<br>P 3.13376500 5.21214500 5.04340700<br>F 3.86379200 6.50241300 5.59132800<br>F 1.65705300 5.71259900 5.33025200<br>F 3.28812200 4.34766800 6.35502700<br>C -1.83892700 3.80132300 8.11926800<br>Pd 1.11911500 2.65072800 3.92806200<br>Br 1.34155700 3.13473600 1.58842400<br>Br 3.14400500 1.36167900 3.89800200 |
| Br <sub>2</sub> (Phen)Pd···AsF <sub>3</sub> | Pd 1.17323100 2.65394700 4.01800700<br>N 0.77832800 2.31310000 6.01142200<br>N -0.55550000 3.75890900 4.21373500<br>C -1.18284900 4.46867900 3.29704100<br>C -0.30121800 3.00241700 6.44614700<br>C 1.47113900 1.59474300 6.87267000<br>C -0.72091500 2.98519100 7.78452300<br>C 1.11996600 1.51829100 8.22428400<br>H 1.72421700 0.91416600 8.88850900<br>C -2.31336900 5.23468100 3.59935700<br>H -2.78963100 5.79936400 2.80840100<br>C 0.02953000 2.21052800 8.68338800<br>H -0.25797400 2.17172800 9.72831700<br>C -1.01354400 3.77393900 5.48632600<br>C -2.13684600 4.51764600 5.87721800<br>H -2.18292400 3.73164600 9.19490700<br>C -2.54570900 4.48307900 7.24389000<br>H -3.41336200 5.06289000 7.53767200<br>C -2.79123100 5.26341000 4.88382500<br>H -3.66211300 5.85527400 5.14326000<br>H 2.33446700 1.07830900 6.46732800<br>H -0.75909900 4.42830100 2.29944000<br>Br 1.50994200 3.25314600 1.71574000<br>Br 3.21634300 1.38906600 4.01925900                                                                                                                                                                                                |

|                                             |                                                                                                                                                                                                                                                                                                                                                                                                                                                                                                                                                                                                                                                                                                                                                                                                                                                                                                                                                                                                                                                                                                                                                                 |
|---------------------------------------------|-----------------------------------------------------------------------------------------------------------------------------------------------------------------------------------------------------------------------------------------------------------------------------------------------------------------------------------------------------------------------------------------------------------------------------------------------------------------------------------------------------------------------------------------------------------------------------------------------------------------------------------------------------------------------------------------------------------------------------------------------------------------------------------------------------------------------------------------------------------------------------------------------------------------------------------------------------------------------------------------------------------------------------------------------------------------------------------------------------------------------------------------------------------------|
|                                             | As 3.06985700 5.19246400 4.72001900<br>F 3.90232100 6.61246800 5.25704000<br>F 1.52573000 5.97438700 4.66126800<br>F 2.83794200 4.57648900 6.32096300<br>C -1.86705300 3.74878300 8.15796700                                                                                                                                                                                                                                                                                                                                                                                                                                                                                                                                                                                                                                                                                                                                                                                                                                                                                                                                                                    |
| Br <sub>2</sub> (Phen)Pd···SbF <sub>3</sub> | Pd 1.18238900 2.61393300 4.04149500<br>N 0.75764400 2.25751200 6.02450600<br>N -0.53178800 3.73977200 4.22410500<br>C -1.13122100 4.47304400 3.30780600<br>C -0.30553600 2.97341200 6.45571800<br>C 1.42832600 1.52002700 6.88639300<br>C -0.72971600 2.96559700 7.79241900<br>C 1.06963600 1.44932700 8.23619400<br>H 1.65563600 0.82864100 8.90141200<br>C -2.23975500 5.27083300 3.60769700<br>H -2.69329300 5.85437500 2.81723300<br>C -0.00327400 2.16987300 8.69239700<br>H -0.29452800 2.13811200 9.73649700<br>C -0.99308500 3.76511500 5.49525500<br>C -2.09464100 4.54116500 5.88372400<br>H -2.17316500 3.75203500 9.19991900<br>C -2.50843800 4.51645000 7.24899900<br>H -3.35875500 5.12204700 7.54130200<br>C -2.72191900 5.30929600 4.88994100<br>H -3.57439400 5.92783400 5.14813800<br>H 2.28157100 0.98405700 6.48619400<br>H -0.70300600 4.42957300 2.31291700<br>Br 1.56521900 3.22767300 1.74611400<br>Br 3.23161100 1.35398100 4.06620500<br>Sb 3.07566100 5.18718200 4.61464700<br>F 3.86872300 6.78341500 5.29662200<br>F 1.39361800 6.05112800 4.37733400<br>F 2.60069700 4.60066900 6.36697300<br>C -1.85454100 3.76096300 8.16376600 |
| Br <sub>2</sub> (Phen)Pd···SF <sub>2</sub>  | Pd 1.25629400 2.67262500 4.02296600<br>N 0.90909100 2.32153400 6.02654500<br>N -0.39759300 3.87545400 4.30031400<br>C -1.00862000 4.64329100 3.41889200<br>C -0.14535700 3.02492900 6.49904200<br>C 1.58773100 1.54941800 6.85272500<br>C -0.55371100 2.96784000 7.83993400<br>C 1.24785700 1.43283200 8.20466700<br>H 1.83925900 0.78534100 8.83905800<br>C -2.11074100 5.43239400 3.76321900<br>H -2.57533400 6.04403600 3.00069300<br>C 0.18172900 2.13776200 8.70098400<br>H -0.09862600 2.06544200 9.74610900<br>C -0.84315300 3.85469400 5.57728500<br>C -1.93933400 4.61663300 6.00855100<br>H -1.98263700 3.69849800 9.29226300<br>C -2.33808200 4.53892300 7.37663200<br>H -3.18623300 5.13100800 7.70135400<br>C -2.57781600 5.42244000 5.05241300<br>H -3.42840000 6.02899200 5.34345100<br>H 2.42539700 1.01672400 6.41435200<br>H -0.59655100 4.62403500 2.41532200                                                                                                                                                                                                                                                                                |

|                                             |                                                                                                                                                                                                                                                                                                                                                                                                                                                                                                                                                                                                                                                                                                                                                                                                                                                                                                                                                                                                                                                                                                                          |
|---------------------------------------------|--------------------------------------------------------------------------------------------------------------------------------------------------------------------------------------------------------------------------------------------------------------------------------------------------------------------------------------------------------------------------------------------------------------------------------------------------------------------------------------------------------------------------------------------------------------------------------------------------------------------------------------------------------------------------------------------------------------------------------------------------------------------------------------------------------------------------------------------------------------------------------------------------------------------------------------------------------------------------------------------------------------------------------------------------------------------------------------------------------------------------|
|                                             | Br 1.51295600 3.24057000 1.70410300<br>Br 3.17159400 1.23682700 3.91882100<br>F 3.27436900 6.95690900 4.74271900<br>F 2.02122800 5.31179700 5.96036600<br>C -1.67414700 3.74881700 8.25415500<br>S 2.62441000 5.51234500 4.48281500                                                                                                                                                                                                                                                                                                                                                                                                                                                                                                                                                                                                                                                                                                                                                                                                                                                                                      |
| Br <sub>2</sub> (Phen)Pd···SeF <sub>2</sub> | Pd 1.24013300 2.69344800 4.01052100<br>N 0.90710700 2.33746300 6.01587500<br>N -0.42535100 3.87954100 4.29655800<br>C -1.04533800 4.64430800 3.41900100<br>C -0.14854700 3.03412300 6.49424100<br>C 1.60247200 1.57745700 6.83856000<br>C -0.54292700 2.98014300 7.83896300<br>C 1.27748700 1.46509200 8.19442800<br>H 1.88262200 0.82836700 8.82665500<br>C -2.14933500 5.42704800 3.77083100<br>H -2.62215400 6.03682800 3.01197100<br>C 0.20927800 2.16205400 8.69695800<br>H -0.05917400 2.09380900 9.74545600<br>C -0.85993800 3.85653600 5.57689100<br>C -1.95643400 4.61320700 6.01570200<br>H -1.96249300 3.70641300 9.30247800<br>C -2.34256600 4.53701300 7.38742400<br>H -3.19099000 5.12524400 7.71821300<br>C -2.60627900 5.41464300 5.06363100<br>H -3.45712100 6.01773000 5.36098200<br>H 2.44203300 1.05169300 6.39608900<br>H -0.63975800 4.62955600 2.41297400<br>Br 1.48646300 3.25936100 1.68825300<br>Br 3.16110300 1.26963200 3.89119800<br>F 3.43811200 6.90585700 4.79531700<br>F 1.95515500 5.21668800 6.01271600<br>C -1.66497500 3.75449400 8.26110700<br>Se 2.66699700 5.37436600 4.41675700 |
| Br <sub>2</sub> (Phen)Pd···TeF <sub>2</sub> | Pd 1.23096400 2.67169900 4.01507400<br>N 0.89242800 2.31212400 6.01706200<br>N -0.43221700 3.86126500 4.29772000<br>C -1.04738000 4.62970500 3.41967100<br>C -0.15522200 3.01967400 6.49633200<br>C 1.58789800 1.55337300 6.84056200<br>C -0.54327200 2.97591300 7.84293400<br>C 1.26969900 1.45209600 8.19876900<br>H 1.87489500 0.81646500 8.83196700<br>C -2.14718500 5.41812100 3.77115200<br>H -2.61682200 6.03011000 3.01220400<br>C 0.20842300 2.15879800 8.70210900<br>H -0.05444600 2.09950800 9.75254700<br>C -0.86412900 3.84302900 5.57878000<br>C -1.95386100 4.60868000 6.01796700<br>H -1.95042200 3.71997000 9.30936300<br>C -2.33490100 4.54181500 7.39147800<br>H -3.17766100 5.13770000 7.72291600<br>C -2.60095200 5.41126100 5.06499800<br>H -3.44657100 6.02131500 5.36296600<br>H 2.42187900 1.01927200 6.39809500<br>H -0.64211500 4.61520800 2.41390000                                                                                                                                                                                                                                         |

|                                |                                                                                                                                                                                                                                                                                                                                                                                                                                                                                                                                                                                                                                                                                                                                                                                                                                                                                                                                                                                                                                                                                     |
|--------------------------------|-------------------------------------------------------------------------------------------------------------------------------------------------------------------------------------------------------------------------------------------------------------------------------------------------------------------------------------------------------------------------------------------------------------------------------------------------------------------------------------------------------------------------------------------------------------------------------------------------------------------------------------------------------------------------------------------------------------------------------------------------------------------------------------------------------------------------------------------------------------------------------------------------------------------------------------------------------------------------------------------------------------------------------------------------------------------------------------|
|                                | Br 1.52051500 3.27423700 1.70355800<br>Br 3.13132000 1.22117400 3.89015800<br>F 3.51358400 7.07563100 4.86801700<br>F 1.88084000 5.19775500 5.99904800<br>C -1.65811300 3.75993500 8.26621300<br>Te 2.68840800 5.44628500 4.27418800                                                                                                                                                                                                                                                                                                                                                                                                                                                                                                                                                                                                                                                                                                                                                                                                                                                |
| Br <sub>2</sub> (Phen)Pd···ClF | Pd 0.89338600 2.00148000 3.84815400<br>N 0.43639600 1.63435900 5.83350600<br>N -0.88675900 3.04819300 3.99343700<br>C -1.50287400 3.74542500 3.06013600<br>C -0.69772400 2.25883900 6.22323100<br>C 1.12487700 0.93695800 6.71464900<br>C -1.18235900 2.19120700 7.53812400<br>C 0.71274500 0.81639400 8.04611900<br>H 1.31500700 0.23270900 8.73016300<br>C -2.68414400 4.44787400 3.32159400<br>H -3.15001100 5.00619800 2.51999100<br>C -0.43596300 1.43969900 8.46019200<br>H -0.77334300 1.36368500 9.48804500<br>C -1.40276800 3.01246700 5.24265300<br>C -2.58207300 3.68783600 5.59128800<br>C -2.38585600 2.88368300 7.86731000<br>H -2.75227100 2.82605500 8.88598500<br>C -3.05666400 3.60106500 6.93424300<br>H -3.96845100 4.12669300 7.19431800<br>C -3.22485200 4.42168300 4.58113500<br>H -4.13764600 4.96132200 4.80847300<br>H 2.03023100 0.47043600 6.34022800<br>H -1.03114600 3.74173900 2.08292200<br>Br 1.22107000 2.51141400 1.53482900<br>Br 2.90665800 0.71128900 3.87906900<br>F 2.51039100 5.71635200 5.53782600<br>Cl 1.98256700 4.29103000 4.82330300 |
| Br <sub>2</sub> (Phen)Pd···BrF | Pd 0.86940100 1.96505200 3.83708400<br>N 0.41718100 1.60606600 5.82570600<br>N -0.90636700 3.02007300 3.98528100<br>C -1.52104200 3.71915700 3.05242600<br>C -0.71152700 2.23904400 6.21758900<br>C 1.10725400 0.91076200 6.70724500<br>C -1.18879200 2.18226100 7.53556300<br>C 0.70179200 0.80025100 8.04149500<br>H 1.30502100 0.21795500 8.72582900<br>C -2.69570900 4.43126200 3.31679900<br>H -3.16073200 4.99072600 2.51553600<br>C -0.44119600 1.43234800 8.45798200<br>H -0.77264600 1.36520300 9.48835800<br>C -1.41658500 2.99245700 5.23713200<br>C -2.58866300 3.67849800 5.58881900<br>C -2.38561700 2.88470400 7.86777600<br>H -2.74624000 2.83567300 8.88894000<br>C -3.05654300 3.60191300 6.93470400<br>H -3.96265600 4.13601700 7.19723700<br>C -3.23046200 4.41368400 4.57900000<br>H -4.13741700 4.96197900 4.80888900<br>H 2.00898700 0.43847900 6.33167500<br>H -1.05342800 3.71025900 2.07341300                                                                                                                                                            |

|                               |                                                                                                                                                                                                                                                                                                                                                                                                                                                                                                                                                                                                                                                                                                                                                                                                                                                                                                                                                                                                                                                                                    |
|-------------------------------|------------------------------------------------------------------------------------------------------------------------------------------------------------------------------------------------------------------------------------------------------------------------------------------------------------------------------------------------------------------------------------------------------------------------------------------------------------------------------------------------------------------------------------------------------------------------------------------------------------------------------------------------------------------------------------------------------------------------------------------------------------------------------------------------------------------------------------------------------------------------------------------------------------------------------------------------------------------------------------------------------------------------------------------------------------------------------------|
|                               | Br 1.19741700 2.47184600 1.52508300<br>Br 2.87972100 0.67371100 3.86537400<br>Br 2.06594100 4.33156100 4.79549100<br>F 2.62623500 5.86907600 5.57590000                                                                                                                                                                                                                                                                                                                                                                                                                                                                                                                                                                                                                                                                                                                                                                                                                                                                                                                            |
| Br <sub>2</sub> (Phen)Pd···IF | N 0.40095200 1.57675500 5.81477200<br>N -0.92267200 2.99095800 3.97474100<br>C -1.53724300 3.69088300 3.04225400<br>C -0.72278200 2.21741200 6.20915900<br>C 1.09150500 0.88204100 6.69662500<br>C -1.19331900 2.17012100 7.52987900<br>C 0.69228700 0.78047800 8.03334600<br>H 1.29607300 0.19868500 8.71759100<br>C -2.70597900 4.41149000 3.30927400<br>H -3.17071300 4.97136000 2.50815000<br>C -0.44497300 1.42109900 8.45241700<br>H -0.77124700 1.36143300 9.48488700<br>C -1.42790000 2.97071600 5.22898400<br>C -2.59354700 3.66611800 5.58344900<br>C -2.38414200 2.88129800 7.86485500<br>H -2.73969900 2.83939200 8.88809500<br>C -3.05531100 3.59837800 6.93186800<br>H -3.95660100 4.13952900 7.19649600<br>C -3.23498600 4.40208000 4.57395900<br>H -4.13701600 4.95748500 4.80607000<br>H 1.98941400 0.40363600 6.31999400<br>H -1.07405800 3.67694400 2.06133300<br>F 2.80756200 6.08817600 5.60951600<br>I 2.23014400 4.43048500 4.75168300<br>Br 1.18079600 2.44059400 1.51395600<br>Br 2.86259100 0.64396200 3.85222700<br>Pd 0.84711000 1.92647700 3.82312200 |



**Table S6 (Continuation).** XYZ coordinates of the optimized geometries for the studied complexes.

|                            |                                                                                                                                                                                                                                                                                                                                                                                                                                                                                                                                                                                                                                                                                                                                                                                                                                                                                                                                                                                                                                                                                                                                                             |
|----------------------------|-------------------------------------------------------------------------------------------------------------------------------------------------------------------------------------------------------------------------------------------------------------------------------------------------------------------------------------------------------------------------------------------------------------------------------------------------------------------------------------------------------------------------------------------------------------------------------------------------------------------------------------------------------------------------------------------------------------------------------------------------------------------------------------------------------------------------------------------------------------------------------------------------------------------------------------------------------------------------------------------------------------------------------------------------------------------------------------------------------------------------------------------------------------|
| $I_2(Phen)Pd \cdots PF_3$  | N 0.79858300 2.35923700 5.94864800<br>N -0.60540900 3.75579900 4.14001800<br>C -1.27924000 4.43221100 3.23046800<br>C -0.28016800 3.04834200 6.38657800<br>C 1.50856300 1.66693100 6.81796300<br>C -0.67409500 3.05693700 7.73489200<br>C 1.18632100 1.61829200 8.17753300<br>H 1.80814000 1.03378800 8.84326800<br>C -2.41441700 5.18541800 3.54625800<br>H -2.92554000 5.72039000 2.75620000<br>C 0.09860500 2.31180700 8.63935400<br>H -0.17219200 2.29562000 9.68939600<br>C -1.02704900 3.78975000 5.42493200<br>C -2.15460700 4.52267100 5.83089200<br>H -2.11328700 3.81066400 9.16406600<br>C -2.53224100 4.51425400 7.20643400<br>H -3.40321700 5.08627700 7.50582300<br>C -2.85331600 5.23455400 4.84336100<br>H -3.72823500 5.81372900 5.11773900<br>H 2.36805800 1.14185000 6.41356800<br>H -0.89358000 4.37382800 2.21743600<br>P 3.09910900 5.24374400 5.05772800<br>F 3.80258100 6.54188200 5.62095200<br>F 1.61165100 5.72473600 5.31491900<br>F 3.23923500 4.37867500 6.37031000<br>C -1.82178200 3.81156500 8.11981000<br>Pd 1.14298000 2.62436000 3.89885200<br>I 1.42953600 3.12615200 1.39142300<br>I 3.30468700 1.22963500 3.81454200 |
| $I_2(Phen)Pd \cdots AsF_3$ | Pd 1.19327900 2.61959000 3.97591800<br>N 0.78404900 2.29009000 6.00137900<br>N -0.55816100 3.74534500 4.19241500<br>C -1.19862600 4.45231200 3.28289800<br>C -0.28412900 2.99883100 6.43259800<br>C 1.46341700 1.56781000 6.86973900<br>C -0.69774100 2.99829200 7.77473000<br>C 1.11844900 1.50600000 8.22316000<br>H 1.71531400 0.89644500 8.88918900<br>C -2.31901700 5.22938500 3.59221800<br>H -2.80273900 5.78988600 2.80273900<br>C 0.04233100 2.22076700 8.67908200<br>H -0.24351000 2.19743300 9.72496000<br>C -0.99764000 3.77178500 5.47121000<br>C -2.11113400 4.52863700 5.87083900<br>H -2.13601200 3.77154600 9.19408300<br>C -2.50843200 4.51193100 7.24059900<br>H -3.36715100 5.10418900 7.53586900<br>C -2.77558100 5.27230500 4.88315800<br>H -3.63765900 5.87237600 5.15307600<br>H 2.31815200 1.03029600 6.47271400<br>H -0.79610900 4.40539300 2.27644300<br>As 3.02354700 5.23709700 4.78949000<br>F 3.80522900 6.67002500 5.36478700                                                                                                                                                                                               |

|                                               |                                                                                                                                                                                                                                                                                                                                                                                                                                                                                                                                                                                                                                                                                                                                                                                                                                                                                                                                                                                                                                                                                                                                                               |
|-----------------------------------------------|---------------------------------------------------------------------------------------------------------------------------------------------------------------------------------------------------------------------------------------------------------------------------------------------------------------------------------------------------------------------------------------------------------------------------------------------------------------------------------------------------------------------------------------------------------------------------------------------------------------------------------------------------------------------------------------------------------------------------------------------------------------------------------------------------------------------------------------------------------------------------------------------------------------------------------------------------------------------------------------------------------------------------------------------------------------------------------------------------------------------------------------------------------------|
|                                               | F 1.46010600 5.97492600 4.71115000<br>F 2.77955100 4.58602900 6.37339000<br>C -1.83032300 3.77791100 8.15395400<br>I 1.58433400 3.22409500 1.50218000<br>I 3.38097100 1.25903700 3.92940400                                                                                                                                                                                                                                                                                                                                                                                                                                                                                                                                                                                                                                                                                                                                                                                                                                                                                                                                                                   |
| $I_2(\text{Phen})\text{Pd}\cdots\text{SbF}_3$ | Pd 1.21343000 2.57220200 4.01378700<br>N 0.76808300 2.22527700 6.02736500<br>N -0.51490800 3.73047900 4.21638600<br>C -1.11994300 4.46839300 3.30761800<br>C -0.28346700 2.96104900 6.45321400<br>C 1.41643200 1.47563800 6.89563300<br>C -0.70966100 2.96277800 7.79101700<br>C 1.05562400 1.41227900 8.24476700<br>H 1.62718300 0.77959200 8.91136000<br>C -2.21641300 5.27961100 3.61293300<br>H -2.67070500 5.86531600 2.82446300<br>C -0.00240600 2.15619600 8.69590900<br>H -0.29840900 2.13417000 9.73896400<br>C -0.96381100 3.76200500 5.49187400<br>C -2.05458300 4.55266400 5.88708400<br>H -2.13454500 3.77167700 9.20375500<br>C -2.46457800 4.53888400 7.25300800<br>H -3.30511300 5.15797700 7.54539400<br>C -2.68369700 5.32655200 4.89948300<br>H -3.52627700 5.95470900 5.16690200<br>H 2.26007200 0.91716400 6.50483100<br>H -0.70833500 4.42151300 2.30552900<br>Sb 2.99828000 5.26241100 4.64775700<br>F 3.74877800 6.86541400 5.35924700<br>F 1.33490900 6.11937300 4.29585400<br>F 2.41770500 4.69187200 6.37243800<br>C -1.81985000 3.77549900 8.16635100<br>I 1.64130800 3.16569300 1.53889100<br>I 3.40094300 1.20551200 3.99826800 |
| $I_2(\text{Phen})\text{Pd}\cdots\text{SF}_2$  | Pd 1.27293600 2.66672700 3.98511500<br>N 0.91382300 2.32399600 6.02264700<br>N -0.41233300 3.87800700 4.28434500<br>C -1.03788800 4.64312700 3.41115000<br>C -0.14149100 3.02986900 6.48889500<br>C 1.58778700 1.55788200 6.85771000<br>C -0.54958300 2.97917000 7.83192000<br>C 1.24937000 1.44681500 8.21001200<br>H 1.84085400 0.80249200 8.84763300<br>C -2.13924600 5.43007400 3.76095400<br>H -2.61233100 6.03819300 3.00074800<br>C 0.18361900 2.15504200 8.69996700<br>H -0.09937900 2.09069700 9.74494100<br>C -0.84570200 3.85661800 5.56534300<br>C -1.94262300 4.61685200 6.00351600<br>H -1.97243700 3.71016500 9.28909500<br>C -2.33700600 4.54453600 7.37251200<br>H -3.18512600 5.13677000 7.69710600<br>C -2.59347700 5.41975300 5.05385700<br>H -3.44349700 6.02275000 5.35394300<br>H 2.42809400 1.01943100 6.43080600<br>H -0.64162000 4.62787700 2.40078600                                                                                                                                                                                                                                                                              |

|                                            |                                                                                                                                                                                                                                                                                                                                                                                                                                                                                                                                                                                                                                                                                                                                                                                                                                                                                                                                                                                                                                                                                                                                                                                     |
|--------------------------------------------|-------------------------------------------------------------------------------------------------------------------------------------------------------------------------------------------------------------------------------------------------------------------------------------------------------------------------------------------------------------------------------------------------------------------------------------------------------------------------------------------------------------------------------------------------------------------------------------------------------------------------------------------------------------------------------------------------------------------------------------------------------------------------------------------------------------------------------------------------------------------------------------------------------------------------------------------------------------------------------------------------------------------------------------------------------------------------------------------------------------------------------------------------------------------------------------|
|                                            | <p>F 3.28697700 6.93937300 4.82126500<br/> F 2.07290200 5.24571100 6.01140900<br/> C -1.66896300 3.75877400 8.24940400<br/> S 2.66126000 5.48838500 4.53538900<br/> I 1.56516300 3.22419000 1.48794700<br/> I 3.34890300 1.15998100 3.83034600</p>                                                                                                                                                                                                                                                                                                                                                                                                                                                                                                                                                                                                                                                                                                                                                                                                                                                                                                                                  |
| I <sub>2</sub> (Phen)Pd···SeF <sub>2</sub> | <p>Pd 1.26308100 2.68411100 3.97857400<br/> N 0.91499900 2.33537500 6.01735800<br/> N -0.42986500 3.88351100 4.28610600<br/> C -1.05970500 4.64968900 3.41720200<br/> C -0.14181200 3.03507700 6.48827000<br/> C 1.60184300 1.57800300 6.84909900<br/> C -0.54000100 2.98470400 7.83379100<br/> C 1.27420000 1.46826800 8.20404700<br/> H 1.87639900 0.83193100 8.83955300<br/> C -2.16192600 5.43203500 3.77343200<br/> H -2.63939100 6.04164200 3.01726500<br/> C 0.20596800 2.16903300 8.69889500<br/> H -0.06847300 2.10644400 9.74623200<br/> C -0.85564900 3.85785700 5.56918400<br/> C -1.95241700 4.61405100 6.01371000<br/> H -1.95647700 3.71005300 9.29983600<br/> C -2.33837600 4.54044100 7.38500200<br/> H -3.18654100 5.12969100 7.71470800<br/> C -2.60995600 5.41664700 5.06850000<br/> H -3.45962400 6.01733800 5.37407800<br/> H 2.44405600 1.04565400 6.41885600<br/> H -0.66695700 4.64029500 2.40562300<br/> F 3.41989700 6.91643100 4.83499600<br/> F 1.96695900 5.18717500 6.03340400<br/> C -1.66083700 3.75862000 8.25792700<br/> Se 2.67650100 5.37379100 4.44079800<br/> I 1.54076500 3.23176200 1.47534100<br/> I 3.33340200 1.17285200 3.80703600</p> |
| I <sub>2</sub> (Phen)Pd···TeF <sub>2</sub> | <p>Pd 1.25105600 2.66307100 3.97899600<br/> N 0.90235500 2.31439500 6.01616300<br/> N -0.43674600 3.86830200 4.28537000<br/> C -1.06283800 4.63731700 3.41597000<br/> C -0.14776800 3.02296600 6.48809200<br/> C 1.59197700 1.56131600 6.84922500<br/> C -0.53894600 2.98281200 7.83563400<br/> C 1.27238000 1.46330800 8.20682300<br/> H 1.87693000 0.83056700 8.84361300<br/> C -2.16255700 5.42285900 3.77172000<br/> H -2.63781600 6.03403500 3.01553500<br/> C 0.20916300 2.17101600 8.70231600<br/> H -0.05902200 2.11758000 9.75175500<br/> C -0.86059200 3.84556400 5.56894200<br/> C -1.95207700 4.60871300 6.01373900<br/> H -1.94457800 3.72307200 9.30451300<br/> C -2.33295500 4.54347000 7.38678500<br/> H -3.17676700 5.13851700 7.71711900<br/> C -2.60798400 5.41157300 5.06771000<br/> H -3.45371900 6.01750000 5.37379400<br/> H 2.42937300 1.02200100 6.41883600<br/> H -0.66937000 4.62920100 2.40497900</p>                                                                                                                                                                                                                                                   |

|                               |                                                                                                                                                                                                                                                                                                                                                                                                                                                                                                                                                                                                                                                                                                                                                                                                                                                                                                                                                                                                                                                                                   |
|-------------------------------|-----------------------------------------------------------------------------------------------------------------------------------------------------------------------------------------------------------------------------------------------------------------------------------------------------------------------------------------------------------------------------------------------------------------------------------------------------------------------------------------------------------------------------------------------------------------------------------------------------------------------------------------------------------------------------------------------------------------------------------------------------------------------------------------------------------------------------------------------------------------------------------------------------------------------------------------------------------------------------------------------------------------------------------------------------------------------------------|
|                               | F 3.50351100 7.07355100 4.92821300<br>F 1.89759500 5.16386100 6.04267300<br>C -1.65438200 3.76392600 8.26077900<br>Te 2.70299600 5.43483700 4.32180700<br>I 3.29031300 1.10963500 3.79826000<br>I 1.56207900 3.23726500 1.48337600                                                                                                                                                                                                                                                                                                                                                                                                                                                                                                                                                                                                                                                                                                                                                                                                                                                |
| I <sub>2</sub> (Phen)Pd···ClF | Pd 0.92579200 1.99923500 3.82300600<br>N 0.44046600 1.62733800 5.83763200<br>N -0.89132400 3.05063000 3.98556100<br>C -1.51792800 3.74835400 3.06004600<br>C -0.69266300 2.25722600 6.22013900<br>C 1.11894800 0.93071500 6.72665500<br>C -1.18096100 2.19399300 7.53580800<br>C 0.70464600 0.81371100 8.05727000<br>H 1.30268300 0.22909000 8.74431400<br>C -2.69809800 4.45018600 3.32562700<br>H -3.16898700 5.00777100 2.52636300<br>C -0.44233600 1.44319900 8.46409700<br>H -0.78546900 1.37320200 9.49051500<br>C -1.39910500 3.01231900 5.23768400<br>C -2.57862400 3.68799800 5.59218000<br>C -2.38224500 2.88797000 7.86733000<br>H -2.74639700 2.83112800 8.88689200<br>C -3.05272200 3.60474000 6.93490600<br>H -3.96362200 4.13238600 7.19412300<br>C -3.22955500 4.42235700 4.58820100<br>H -4.14127800 4.96032900 4.82384200<br>H 2.02532600 0.45609900 6.36403000<br>H -1.05829000 3.75037500 2.07667000<br>F 2.48952700 5.71094200 5.55053400<br>Cl 1.99681600 4.28168900 4.80759200<br>I 1.32296500 2.52421800 1.34248500<br>I 3.09484200 0.62756000 3.80880400 |
| I <sub>2</sub> (Phen)Pd···BrF | Pd 0.90240400 1.96095200 3.81191700<br>N 0.42158200 1.59867600 5.83020600<br>N -0.90966600 3.02201700 3.97715300<br>C -1.53432800 3.72186800 3.05196300<br>C -0.70613200 2.23744200 6.21445100<br>C 1.10084000 0.90396700 6.72011300<br>C -1.18772200 2.18513400 7.53295500<br>C 0.69268800 0.79723900 8.05334100<br>H 1.29128800 0.21390400 8.74094200<br>C -2.70740300 4.43427500 3.32003600<br>H -3.17671700 4.99339400 2.52095600<br>C -0.44856500 1.43582100 8.46204000<br>H -0.78637700 1.37470500 9.49076500<br>C -1.41198600 2.99238500 5.23183400<br>C -2.58415000 3.67919000 5.58887700<br>C -2.38234000 2.88925300 7.86694800<br>H -2.74128200 2.84080200 8.88876100<br>C -3.05225700 3.60615100 6.93424000<br>H -3.95754300 4.14238400 7.19538900<br>C -3.23335400 4.41535100 4.58506300<br>H -4.13905600 4.96238500 4.82294500<br>H 2.00343600 0.42301600 6.35672400<br>H -1.07869300 3.71798800 2.06684500                                                                                                                                                          |

|                              |                                                                                                                                                                                                                                                                                                                                                                                                                                                                                                                                                                                                                                                                                                                                                                                                                                                                                                                                                                                                                                                                                  |
|------------------------------|----------------------------------------------------------------------------------------------------------------------------------------------------------------------------------------------------------------------------------------------------------------------------------------------------------------------------------------------------------------------------------------------------------------------------------------------------------------------------------------------------------------------------------------------------------------------------------------------------------------------------------------------------------------------------------------------------------------------------------------------------------------------------------------------------------------------------------------------------------------------------------------------------------------------------------------------------------------------------------------------------------------------------------------------------------------------------------|
|                              | Br 2.08001500 4.32558800 4.78156000<br>F 2.60001500 5.86747800 5.59167600<br>I 3.06715800 0.58620700 3.79606600<br>I 1.29724100 2.48005200 1.33183900                                                                                                                                                                                                                                                                                                                                                                                                                                                                                                                                                                                                                                                                                                                                                                                                                                                                                                                            |
| I <sub>2</sub> (Phen)Pd···IF | Pd 0.88535500 1.94352000 3.80890600<br>N 0.40777400 1.58488800 5.82858400<br>N -0.92414300 3.00843700 3.97628200<br>C -1.54959700 3.70857200 3.05163400<br>C -0.71728900 2.22776800 6.21462700<br>C 1.08768600 0.89086900 6.71874100<br>C -1.19404300 2.18155500 7.53506200<br>C 0.68392500 0.78978400 8.05362000<br>H 1.28338700 0.20715800 8.74104700<br>C -2.71946600 4.42529500 3.32159100<br>H -3.18910500 4.98438100 2.52270100<br>C -0.45373700 1.43346700 8.46422700<br>H -0.78773300 1.37748700 9.49447000<br>C -1.42359400 2.98240500 5.23248800<br>C -2.59186200 3.67465300 5.59158600<br>C -2.38494200 2.89083400 7.87120300<br>H -2.74009500 2.84710500 8.89453500<br>C -3.05565300 3.60720400 6.93868500<br>H -3.95789100 4.14775600 7.20140800<br>C -3.24145500 4.41116800 4.58828500<br>H -4.14414900 4.96235500 4.82792400<br>H 1.98825500 0.40678000 6.35484600<br>H -1.09674000 3.70272200 2.06538700<br>F 2.75086600 6.10935000 5.67512300<br>I 2.23324800 4.45312700 4.76925100<br>I 1.28707600 2.47609800 1.33365500<br>I 3.05632800 0.58002100 3.79643400 |

**Table S6 (Continuation).** XYZ coordinates of the optimized geometries for the studied complexes.

|                                             |                                                                                                                                                                                                                                                                                                                                                                                                                                                                                                                                                                                                                                                                                                                                                                                                                                                                                                                                                                                                                                                                                                                                                               |
|---------------------------------------------|---------------------------------------------------------------------------------------------------------------------------------------------------------------------------------------------------------------------------------------------------------------------------------------------------------------------------------------------------------------------------------------------------------------------------------------------------------------------------------------------------------------------------------------------------------------------------------------------------------------------------------------------------------------------------------------------------------------------------------------------------------------------------------------------------------------------------------------------------------------------------------------------------------------------------------------------------------------------------------------------------------------------------------------------------------------------------------------------------------------------------------------------------------------|
| Cl <sub>2</sub> (Phen)Pt···PF <sub>3</sub>  | N 0.79502100 2.36828000 5.95386300<br>N -0.56108100 3.75351100 4.17425800<br>C -1.20611800 4.43805700 3.24350100<br>C -0.28755600 3.04707700 6.40955500<br>C 1.51424100 1.66238300 6.81129400<br>C -0.68356100 3.03798400 7.75271200<br>C 1.18427400 1.59914800 8.16708000<br>H 1.80721400 1.00808600 8.82585900<br>C -2.34059100 5.19576400 3.54437900<br>H -2.82994900 5.73766600 2.74539800<br>C 0.09257600 2.28129800 8.64438400<br>H -0.17357300 2.24530500 9.69479800<br>C -1.01808900 3.79307200 5.45090000<br>C -2.14546600 4.52943600 5.83528500<br>H -2.14248700 3.78736000 9.16570500<br>C -2.53555900 4.50678800 7.20876500<br>H -3.40774900 5.07776000 7.50638300<br>C -2.81434400 5.24769400 4.83199800<br>H -3.69145300 5.83410900 5.08161900<br>H 2.37207000 1.15129500 6.38945400<br>H -0.79040300 4.37098100 2.24445000<br>Cl 1.31746400 3.07729100 1.74856000<br>Cl 3.00636000 1.36796100 3.95540500<br>P 3.00024600 5.25248000 4.98498200<br>F 3.78400500 6.52424600 5.50859800<br>F 1.54812900 5.82538000 5.26542600<br>F 3.12497500 4.41334900 6.31783300<br>C -1.83636100 3.79368500 8.12572600<br>Pt 1.11744100 2.63959700 3.97375500 |
| Cl <sub>2</sub> (Phen)Pt···AsF <sub>3</sub> | N 0.79407400 2.33803500 5.99894400<br>N -0.52440800 3.76692800 4.22114200<br>C -1.14366400 4.47721000 3.29401900<br>C -0.29225600 3.01437700 6.44651300<br>C 1.49752900 1.61650400 6.85454300<br>C -0.71014600 2.98482700 7.78242400<br>C 1.14508900 1.53117400 8.20366900<br>H 1.75563700 0.92791000 8.86284800<br>C -2.27741100 5.23798600 3.58995200<br>H -2.74605800 5.80286900 2.79464300<br>C 0.04860000 2.20982600 8.67350400<br>H -0.23400000 2.15877900 9.71898400<br>C -1.00182000 3.78310400 5.48984300<br>C -2.12901700 4.52156400 5.86967100<br>H -2.18580700 3.71962300 9.18538500<br>C -2.54238300 4.47655200 7.23557100<br>H -3.41421300 5.04989300 7.52947700<br>C -2.77331900 5.26626500 4.86937700<br>H -3.64849300 5.85675500 5.11614400<br>H 2.36224400 1.11127400 6.44049900<br>H -0.70732100 4.43454300 2.30290300<br>Cl 1.44324200 3.18884900 1.83248700<br>Cl 3.07459700 1.41772000 4.03190000<br>As 2.98287100 5.14889000 4.73445700                                                                                                                                                                                                |

|                                             |                                                                                                                                                                                                                                                                                                                                                                                                                                                                                                                                                                                                                                                                                                                                                                                                                                                                                                                                                                                                                                                                                                                                                                |
|---------------------------------------------|----------------------------------------------------------------------------------------------------------------------------------------------------------------------------------------------------------------------------------------------------------------------------------------------------------------------------------------------------------------------------------------------------------------------------------------------------------------------------------------------------------------------------------------------------------------------------------------------------------------------------------------------------------------------------------------------------------------------------------------------------------------------------------------------------------------------------------------------------------------------------------------------------------------------------------------------------------------------------------------------------------------------------------------------------------------------------------------------------------------------------------------------------------------|
|                                             | F 3.86673700 6.55860900 5.23118900<br>F 1.46411700 5.98549400 4.70903200<br>F 2.79069100 4.57184400 6.35736000<br>C -1.86363100 3.74151000 8.15053500<br>Pt 1.16819300 2.66812800 4.03490600                                                                                                                                                                                                                                                                                                                                                                                                                                                                                                                                                                                                                                                                                                                                                                                                                                                                                                                                                                   |
| Cl <sub>2</sub> (Phen)Pt···SbF <sub>3</sub> | Pt 1.17306100 2.64024600 4.04821500<br>N 0.77431800 2.29845500 6.00747600<br>N -0.51131800 3.75625400 4.22607600<br>C -1.10782300 4.48514100 3.29975100<br>C -0.30066400 2.99431100 6.45064400<br>C 1.46290400 1.56538700 6.86403000<br>C -0.72209300 2.97305700 7.78527100<br>C 1.10510100 1.48555200 8.21209500<br>H 1.70355200 0.87239600 8.87310300<br>C -2.22600300 5.26933700 3.59343300<br>H -2.67662000 5.84972800 2.79903700<br>C 0.02031200 2.18444000 8.67820100<br>H -0.26501900 2.14019900 9.72324600<br>C -0.99165800 3.77832500 5.49302700<br>C -2.10283200 4.54093600 5.87112300<br>H -2.18436400 3.73805000 9.18582600<br>C -2.52077500 4.50340000 7.23566300<br>H -3.37993800 5.09618700 7.52812900<br>C -2.72593800 5.30336300 4.87062400<br>H -3.58734100 5.91403700 5.11669700<br>H 2.32128300 1.04634300 6.45469400<br>H -0.66642200 4.44242300 2.31137700<br>Cl 1.48303000 3.17336500 1.85024200<br>Cl 3.07408200 1.37676500 4.05541300<br>Sb 3.03064200 5.10931000 4.65531500<br>F 3.87730000 6.69856600 5.30299200<br>F 1.36601700 6.02657800 4.47942200<br>F 2.63714100 4.55178800 6.43929600<br>C -1.86025600 3.75309000 8.15151000 |
| Cl <sub>2</sub> (Phen)Pt···SF <sub>2</sub>  | N 0.92112700 2.37029200 5.99967000<br>N -0.40307600 3.88684200 4.30087500<br>C -1.01744600 4.65244900 3.41424200<br>C -0.14408800 3.04916900 6.49261400<br>C 1.63009900 1.60904200 6.81645900<br>C -0.53582900 2.98085600 7.83499400<br>C 1.30385900 1.48503000 8.16940100<br>H 1.91689100 0.84971000 8.79544100<br>C -2.12631800 5.42821600 3.76122500<br>H -2.59375600 6.03698700 2.99818200<br>C 0.22734700 2.16399200 8.68394000<br>H -0.03638800 2.08044700 9.73228200<br>C -0.85631700 3.86596900 5.57851700<br>C -1.95850100 4.61533100 6.00758000<br>H -1.97184200 3.69008200 9.29162000<br>C -2.34818100 4.52666000 7.37849700<br>H -3.20284000 5.10534800 7.71003600<br>C -2.60141400 5.41449600 5.04926600<br>H -3.45882600 6.01371400 5.33445000<br>H 2.47196100 1.09739600 6.36385300<br>H -0.60083300 4.63379500 2.41362400<br>Cl 1.40136500 3.20797100 1.80853400                                                                                                                                                                                                                                                                               |

|                                             |                                                                                                                                                                                                                                                                                                                                                                                                                                                                                                                                                                                                                                                                                                                                                                                                                                                                                                                                                                                                                                                                                                                          |
|---------------------------------------------|--------------------------------------------------------------------------------------------------------------------------------------------------------------------------------------------------------------------------------------------------------------------------------------------------------------------------------------------------------------------------------------------------------------------------------------------------------------------------------------------------------------------------------------------------------------------------------------------------------------------------------------------------------------------------------------------------------------------------------------------------------------------------------------------------------------------------------------------------------------------------------------------------------------------------------------------------------------------------------------------------------------------------------------------------------------------------------------------------------------------------|
|                                             | Cl 3.02784700 1.33038100 3.91252300<br>F 3.39119600 6.74267300 4.79204600<br>F 1.95329100 5.26801600 5.99857400<br>C -1.66788600 3.74472700 8.25245900<br>Pt 1.22642800 2.71226200 4.02511000<br>S 2.64771300 5.33026000 4.54373700                                                                                                                                                                                                                                                                                                                                                                                                                                                                                                                                                                                                                                                                                                                                                                                                                                                                                      |
| Cl <sub>2</sub> (Phen)Pt···SeF <sub>2</sub> | N 0.92347900 2.38587800 5.99270200<br>N -0.41904900 3.89183300 4.29341700<br>C -1.03381000 4.65939900 3.40973300<br>C -0.14856800 3.05320000 6.48415600<br>C 1.64861500 1.64159400 6.80953400<br>C -0.53400900 2.98672200 7.82797400<br>C 1.32963000 1.52026800 8.16454200<br>H 1.95556300 0.89961100 8.79238700<br>C -2.14596500 5.42926400 3.75973200<br>H -2.61478600 6.04096200 2.99999400<br>C 0.24444700 2.18546200 8.67806900<br>H -0.01344800 2.10504600 9.72811400<br>C -0.86978200 3.86336100 5.57103900<br>C -1.97461800 4.60640800 6.00301700<br>H -1.97179100 3.68539800 9.28786800<br>C -2.36127700 4.51519200 7.37451800<br>H -3.21901500 5.08824200 7.70772100<br>C -2.62078400 5.40646700 5.04749000<br>H -3.47993900 6.00178200 5.33561200<br>H 2.49708700 1.14097600 6.35731000<br>H -0.61693300 4.64786200 2.40925700<br>Cl 1.36820200 3.19020600 1.78734000<br>Cl 3.01108100 1.33217400 3.88735200<br>F 3.56899100 6.70113400 4.93142300<br>F 1.80462800 5.24918900 6.03038200<br>C -1.67214500 3.74018300 8.24751400<br>Se 2.72160100 5.20125400 4.52957500<br>Pt 1.21817900 2.72304900 4.01197800 |
| Cl <sub>2</sub> (Phen)Pt···TeF <sub>2</sub> | N 0.91415500 2.37057600 5.98660200<br>N -0.43254800 3.87319000 4.28534900<br>C -1.04331700 4.64428600 3.40217000<br>C -0.15404500 3.04267700 6.47826600<br>C 1.64660500 1.63532000 6.80448000<br>C -0.53024600 2.98818700 7.82488000<br>C 1.33718500 1.52625600 8.16266200<br>H 1.96871400 0.91316600 8.79224100<br>C -2.15017100 5.42079900 3.75407500<br>H -2.61698700 6.03505000 2.99525200<br>C 0.25464200 2.19511900 8.67665300<br>H 0.00463000 2.12521400 9.72935200<br>C -0.87764400 3.84978600 5.56452600<br>C -1.97578200 4.60090900 5.99878200<br>H -1.95610200 3.70151400 9.28923000<br>C -2.35529300 4.51926200 7.37273700<br>H -3.20824700 5.09843200 7.70750900<br>C -2.62053200 5.40232700 5.04341000<br>H -3.47442200 6.00418000 5.33360100<br>H 2.49292800 1.13169200 6.35194200<br>H -0.62916000 4.63067500 2.40079700<br>Cl 1.34303900 3.14433400 1.77103000                                                                                                                                                                                                                                          |



|                                |                                                                                                                                                                                                                                                                                                                                                                                                                                                                                                                                                                                                                                                                                                                                                                                                                                                                                                                                                                                                                                                                                     |
|--------------------------------|-------------------------------------------------------------------------------------------------------------------------------------------------------------------------------------------------------------------------------------------------------------------------------------------------------------------------------------------------------------------------------------------------------------------------------------------------------------------------------------------------------------------------------------------------------------------------------------------------------------------------------------------------------------------------------------------------------------------------------------------------------------------------------------------------------------------------------------------------------------------------------------------------------------------------------------------------------------------------------------------------------------------------------------------------------------------------------------|
|                                | Cl 2.97473600 1.28196100 3.86859100<br>F 3.63430700 6.85384500 5.07569600<br>F 1.72304700 5.23303700 6.07145700<br>C -1.66354500 3.74757100 8.24647900<br>Te 2.78925900 5.22735100 4.47124300<br>Pt 1.20037500 2.69539900 4.00073900                                                                                                                                                                                                                                                                                                                                                                                                                                                                                                                                                                                                                                                                                                                                                                                                                                                |
| Cl <sub>2</sub> (Phen)Pt···ClF | N 0.43987500 1.64723400 5.82139000<br>N -0.86749300 3.04793800 3.99989400<br>C -1.47050100 3.75114600 3.05793600<br>C -0.69856800 2.26244800 6.22269100<br>C 1.14197300 0.95161600 6.69809900<br>C -1.17864300 2.18702500 7.53593200<br>C 0.73052900 0.82574400 8.02781000<br>H 1.34025000 0.24576400 8.70828100<br>C -2.65253100 4.45159200 3.31371900<br>H -3.10846700 5.01381400 2.50922600<br>C -0.42303400 1.43699800 8.45128900<br>H -0.75339200 1.35255800 9.48051600<br>C -1.40014500 3.01427500 5.24515300<br>C -2.57968100 3.68872800 5.58369400<br>C -2.38619700 2.87636600 7.86025800<br>H -2.75655200 2.81713600 8.87733000<br>C -3.05648500 3.59490000 6.92623300<br>H -3.96970300 4.11761100 7.18683700<br>C -3.21017400 4.42441800 4.56750600<br>H -4.12439600 4.96601200 4.78302100<br>H 2.04869700 0.49648800 6.31588700<br>H -0.98527200 3.74745700 2.08844000<br>Cl 1.15993400 2.47013400 1.66242100<br>Cl 2.76606300 0.75013000 3.89987100<br>F 2.49373600 5.69252800 5.53779800<br>Pt 0.87802800 2.01005600 3.86746900<br>Cl 1.90056900 4.24596700 4.85222100 |
| Cl <sub>2</sub> (Phen)Pt···BrF | N 0.42238200 1.62212800 5.81424800<br>N -0.88710100 3.02130800 3.99254500<br>C -1.48900400 3.72622000 3.05114000<br>C -0.71205400 2.24343100 6.21761600<br>C 1.12765000 0.93035600 6.69146000<br>C -1.18514500 2.17760800 7.53379100<br>C 0.72286000 0.81379800 8.02399700<br>H 1.33487900 0.23687500 8.70496500<br>C -2.66573700 4.43437600 3.30975800<br>H -3.12111700 4.99776600 2.50580100<br>C -0.42677200 1.43085600 8.44958900<br>H -0.75145700 1.35424400 9.48122000<br>C -1.41465500 2.99418900 5.24016600<br>C -2.58841400 3.67698800 5.58160200<br>C -2.38782200 2.87407200 7.86082100<br>H -2.75296000 2.82202100 8.88014600<br>C -3.05924400 3.59149000 6.92675600<br>H -3.96819000 4.12046500 7.18955300<br>C -3.21845000 4.41366600 4.56579900<br>H -4.12809600 4.96197800 4.78362500<br>H 2.03160300 0.47106400 6.30788600<br>H -1.00738100 3.71814100 2.07996000<br>Cl 1.12537600 2.41842900 1.64761800                                                                                                                                                            |

|                               |                                                                                                                                                                                                                                                                                                                                                                                                                                                                                                                                                                                                                                                                                                                                                                                                                                                                                                                                                                                                                                                                                    |
|-------------------------------|------------------------------------------------------------------------------------------------------------------------------------------------------------------------------------------------------------------------------------------------------------------------------------------------------------------------------------------------------------------------------------------------------------------------------------------------------------------------------------------------------------------------------------------------------------------------------------------------------------------------------------------------------------------------------------------------------------------------------------------------------------------------------------------------------------------------------------------------------------------------------------------------------------------------------------------------------------------------------------------------------------------------------------------------------------------------------------|
|                               | Cl 2.73157400 0.70136900 3.88216200<br>Br 1.98287000 4.30220700 4.83578600<br>F 2.63568600 5.85319100 5.56317000<br>Pt 0.85204700 1.97178300 3.85514700                                                                                                                                                                                                                                                                                                                                                                                                                                                                                                                                                                                                                                                                                                                                                                                                                                                                                                                            |
| Cl <sub>2</sub> (Phen)Pt···IF | N 0.40430400 1.60014800 5.81050700<br>N -0.90603600 2.99901400 3.98950700<br>C -1.50698800 3.70612900 3.04892000<br>C -0.72761800 2.22523900 6.21568300<br>C 1.11069700 0.90928300 6.68779500<br>C -1.19613900 2.16514100 7.53368800<br>C 0.71000600 0.79792300 8.02191500<br>H 1.32291600 0.22171100 8.70265700<br>C -2.67929800 4.42055700 3.30990400<br>H -3.13368600 4.98567800 2.50662400<br>C -0.43655600 1.41939700 8.44933900<br>H -0.75772000 1.34727400 9.48238200<br>C -1.43055400 2.97600500 5.23867700<br>C -2.59976100 3.66526000 5.58242100<br>C -2.39514400 2.86683500 7.86282600<br>H -2.75699100 2.81897200 8.88351500<br>C -3.06669300 3.58473000 6.92919600<br>H -3.97240300 4.11833200 7.19374600<br>C -3.22871700 4.40403100 4.56744100<br>H -4.13468500 4.95762000 4.78717800<br>H 2.01243800 0.44658700 6.30327100<br>H -1.02815500 3.69519600 2.07645900<br>Cl 1.09508600 2.37709900 1.63821800<br>Cl 2.70198900 0.66286900 3.87118100<br>F 2.82890700 6.07790900 5.57894700<br>Pt 0.82684600 1.93880100 3.84748100<br>I 2.11730400 4.41000500 4.81508900 |

**Table S6 (Continuation).** XYZ coordinates of the optimized geometries for the studied complexes.

|                                                                             |                                                                                                                                                                                                                                                                                                                                                                                                                                                                                                                                                                                                                                                                                                                                                                                                                                                                                                                                                                                                                                                                                                                                                                                                                                                                                                                                                                                                                                                                                                                      |
|-----------------------------------------------------------------------------|----------------------------------------------------------------------------------------------------------------------------------------------------------------------------------------------------------------------------------------------------------------------------------------------------------------------------------------------------------------------------------------------------------------------------------------------------------------------------------------------------------------------------------------------------------------------------------------------------------------------------------------------------------------------------------------------------------------------------------------------------------------------------------------------------------------------------------------------------------------------------------------------------------------------------------------------------------------------------------------------------------------------------------------------------------------------------------------------------------------------------------------------------------------------------------------------------------------------------------------------------------------------------------------------------------------------------------------------------------------------------------------------------------------------------------------------------------------------------------------------------------------------|
| <p style="text-align: center;">Br<sub>2</sub>(Phen)Pt···PF<sub>3</sub></p>  | <p>N 0.79141200 2.36246500 5.95856600<br/>           N -0.56836700 3.75305800 4.17365600<br/>           C -1.21943900 4.43839400 3.24777900<br/>           C -0.28933000 3.04624000 6.41113000<br/>           C 1.50471200 1.65674600 6.82101800<br/>           C -0.68615000 3.04107800 7.75510500<br/>           C 1.17434900 1.59720900 8.17669000<br/>           H 1.79506700 1.00496800 8.83652000<br/>           C -2.35201600 5.19740300 3.55170200<br/>           H -2.84361100 5.73866000 2.75364800<br/>           C 0.08532400 2.28453100 8.65049100<br/>           H -0.18325200 2.25315400 9.70046200<br/>           C -1.01998700 3.79291100 5.45218300<br/>           C -2.14604900 4.53126000 5.84020600<br/>           H -2.13978800 3.79421800 9.17072500<br/>           C -2.53486600 4.51226800 7.21356500<br/>           H -3.40561500 5.08569900 7.51063300<br/>           C -2.81942800 5.25015900 4.84078800<br/>           H -3.69478700 5.83705300 5.09548700<br/>           H 2.36243600 1.13933700 6.40598900<br/>           H -0.81169800 4.37397400 2.24498000<br/>           Br 1.35504600 3.09041700 1.60608700<br/>           Br 3.12756000 1.28779400 3.92555500<br/>           P 3.00842800 5.26472100 5.00173600<br/>           F 3.77239500 6.54215800 5.53982300<br/>           F 1.54676400 5.82993200 5.24350400<br/>           F 3.10366700 4.43051200 6.34017100<br/>           C -1.83604400 3.79926600 8.13005400<br/>           Pt 1.12293900 2.63144600 3.96368900</p> |
| <p style="text-align: center;">Br<sub>2</sub>(Phen)Pt···AsF<sub>3</sub></p> | <p>N 0.79139300 2.32911100 5.99958700<br/>           N -0.53049100 3.76319300 4.21678800<br/>           C -1.15670700 4.47295700 3.29399700<br/>           C -0.29001400 3.01452200 6.44538500<br/>           C 1.48770900 1.60592600 6.85957900<br/>           C -0.70592700 2.99238900 7.78305100<br/>           C 1.13733500 1.52745200 8.20945900<br/>           H 1.74471000 0.92153200 8.86915100<br/>           C -2.28606000 5.23837600 3.59383700<br/>           H -2.75771700 5.80145200 2.79901100<br/>           C 0.04727700 2.21621900 8.67737000<br/>           H -0.23558600 2.17246400 9.72313400<br/>           C -0.99958000 3.78389200 5.48855800<br/>           C -2.12272900 4.52797000 5.87287800<br/>           H -2.17081700 3.73819900 9.19063700<br/>           C -2.53163700 4.49084300 7.23980600<br/>           H -3.39965400 5.06977000 7.53400500<br/>           C -2.77223100 5.27229100 4.87606100<br/>           H -3.64362500 5.86598400 5.12854600<br/>           H 2.34920900 1.09036700 6.45097100<br/>           H -0.73092000 4.42907200 2.29810200<br/>           Br 1.47626700 3.19074300 1.68436000<br/>           Br 3.19058900 1.32554700 3.99706500<br/>           As 2.96741600 5.17093500 4.76447100</p>                                                                                                                                                                                                                                                            |

|                                             |                                                                                                                                                                                                                                                                                                                                                                                                                                                                                                                                                                                                                                                                                                                                                                                                                                                                                                                                                                                                                                                                                                                                                                                                                               |
|---------------------------------------------|-------------------------------------------------------------------------------------------------------------------------------------------------------------------------------------------------------------------------------------------------------------------------------------------------------------------------------------------------------------------------------------------------------------------------------------------------------------------------------------------------------------------------------------------------------------------------------------------------------------------------------------------------------------------------------------------------------------------------------------------------------------------------------------------------------------------------------------------------------------------------------------------------------------------------------------------------------------------------------------------------------------------------------------------------------------------------------------------------------------------------------------------------------------------------------------------------------------------------------|
|                                             | <p>F 3.82448600 6.58785500 5.28515800<br/> F 1.43653300 5.98395300 4.72776900<br/> F 2.76186200 4.57451200 6.37832800<br/> C -1.85331300 3.75580100 8.15427500<br/> Pt 1.17189600 2.65371200 4.02058400</p>                                                                                                                                                                                                                                                                                                                                                                                                                                                                                                                                                                                                                                                                                                                                                                                                                                                                                                                                                                                                                   |
| Br <sub>2</sub> (Phen)Pt···SbF <sub>3</sub> | <p>Pt 1.17860400 2.62352900 4.03503800<br/> N 0.77314100 2.28798000 6.00908300<br/> N -0.51430700 3.75148200 4.22236400<br/> C -1.11770900 4.47938400 3.29970900<br/> C -0.29581100 2.99426900 6.45050200<br/> C 1.45250500 1.55113800 6.86980300<br/> C -0.71551100 2.98064300 7.78674200<br/> C 1.09626600 1.47815700 8.21843500<br/> H 1.68983500 0.86061600 8.87979400<br/> C -2.23064400 5.26922900 3.59697500<br/> H -2.68419400 5.84741100 2.80262000<br/> C 0.01954700 2.18923100 8.68276900<br/> H -0.26618100 2.15239800 9.72801100<br/> C -0.98590200 3.77940600 5.49254400<br/> C -2.09218500 4.54875800 5.87475200<br/> H -2.16577300 3.75871800 9.19173200<br/> C -2.50535600 4.52004100 7.24042500<br/> H -3.35979600 5.11950900 7.53307100<br/> C -2.72015700 5.31051500 4.87721900<br/> H -3.57706900 5.92532800 5.12868100<br/> H 2.30631700 1.02013000 6.46572300<br/> H -0.68727300 4.43412300 2.30641600<br/> Br 1.51469200 3.16562300 1.70085800<br/> Br 3.18930100 1.27783200 4.02319500<br/> Sb 3.00684100 5.13772500 4.68809100<br/> F 3.82074100 6.73463400 5.35709200<br/> F 1.33375200 6.03206100 4.48360300<br/> F 2.58232900 4.56816500 6.46076600<br/> C -1.84632600 3.76899500 8.15591900</p> |
| Br <sub>2</sub> (Phen)Pt···SF <sub>2</sub>  | <p>N 0.91839300 2.36718400 6.00530900<br/> N -0.40946100 3.88836200 4.30086700<br/> C -1.02863400 4.65586400 3.41921600<br/> C -0.14622900 3.04959800 6.49463300<br/> C 1.62241700 1.60773000 6.82797200<br/> C -0.53945500 2.98483200 7.83779900<br/> C 1.29527200 1.48726400 8.18080600<br/> H 1.90695900 0.85217200 8.80841100<br/> C -2.13575400 5.43254500 3.76879800<br/> H -2.60447500 6.04152700 3.00669200<br/> C 0.21976000 2.16943600 8.69120300<br/> H -0.04696100 2.09030000 9.73915700<br/> C -0.85836300 3.86690500 5.58004300<br/> C -1.95984700 4.61742600 6.01217100<br/> H -1.97219700 3.69553100 9.29612800<br/> C -2.34950500 4.53132000 7.38274300<br/> H -3.20340500 5.11165800 7.71332200<br/> C -2.60625500 5.41791200 5.05776400<br/> H -3.46241300 6.01675000 5.34756700<br/> H 2.46523600 1.09077300 6.38256300<br/> H -0.61911800 4.64069200 2.41530800<br/> Br 1.42542900 3.20985800 1.66174100</p>                                                                                                                                                                                                                                                                                             |

|                                             |                                                                                                                                                                                                                                                                                                                                                                                                                                                                                                                                                                                                                                                                                                                                                                                                                                                                                                                                                                                                                                                                                                                          |
|---------------------------------------------|--------------------------------------------------------------------------------------------------------------------------------------------------------------------------------------------------------------------------------------------------------------------------------------------------------------------------------------------------------------------------------------------------------------------------------------------------------------------------------------------------------------------------------------------------------------------------------------------------------------------------------------------------------------------------------------------------------------------------------------------------------------------------------------------------------------------------------------------------------------------------------------------------------------------------------------------------------------------------------------------------------------------------------------------------------------------------------------------------------------------------|
|                                             | Br 3.14045400 1.24169700 3.87723700<br>F 3.36891100 6.76921900 4.81217500<br>F 1.96931700 5.25278000 6.01482300<br>C -1.66977800 3.74966500 8.25650100<br>Pt 1.23016800 2.70375300 4.01499200<br>S 2.64511700 5.34936000 4.55380900                                                                                                                                                                                                                                                                                                                                                                                                                                                                                                                                                                                                                                                                                                                                                                                                                                                                                      |
| Br <sub>2</sub> (Phen)Pt···SeF <sub>2</sub> | N 0.92188500 2.38310600 6.00071900<br>N -0.42216000 3.89508200 4.29570700<br>C -1.03956200 4.66645800 3.41712500<br>C -0.15045500 3.05313800 6.48784500<br>C 1.64122500 1.64006700 6.82377100<br>C -0.53936500 2.98859000 7.83179400<br>C 1.31940400 1.52075900 8.17804500<br>H 1.94334300 0.89990200 8.80770200<br>C -2.15028600 5.43704900 3.76893400<br>H -2.61874000 6.05045300 3.01032600<br>C 0.23410800 2.18810800 8.68661700<br>H -0.02830200 2.11077000 9.73579600<br>C -0.87044400 3.86469600 5.57412500<br>C -1.97514100 4.60858200 6.00833800<br>H -1.97635600 3.68677400 9.29193600<br>C -2.36392500 4.51810300 7.37879500<br>H -3.22145700 5.09232200 7.71049300<br>C -2.62296400 5.41139600 5.05673500<br>H -3.48126800 6.00607700 5.34875300<br>H 2.49153000 1.13499100 6.37939600<br>H -0.62780400 4.65975600 2.41421300<br>Br 1.39269400 3.18935700 1.64182100<br>Br 3.12288600 1.23963900 3.85514400<br>F 3.53162000 6.73723300 4.92591800<br>F 1.83093600 5.22578300 6.04953500<br>C -1.67662400 3.74233000 8.25165200<br>Se 2.70610800 5.22591900 4.52368500<br>Pt 1.22469500 2.71567200 4.00483100 |
| Br <sub>2</sub> (Phen)Pt···TeF <sub>2</sub> | N 0.91492000 2.37175400 5.99477200<br>N -0.43538300 3.87795600 4.28738000<br>C -1.04890000 4.65295800 3.40944800<br>C -0.15558400 3.04385900 6.48159200<br>C 1.64391600 1.64077300 6.81957300<br>C -0.53556700 2.99059500 7.82820500<br>C 1.33166300 1.53356200 8.17700000<br>H 1.96309900 0.92280300 8.80896400<br>C -2.15610300 5.42783000 3.76271000<br>H -2.62275100 6.04377800 3.00513700<br>C 0.24651900 2.20109400 8.68532500<br>H -0.00820600 2.13381000 9.73708300<br>C -0.87917500 3.85089500 5.56696400<br>C -1.97891500 4.60053100 6.00294900<br>H -1.96345700 3.69948900 9.29196000<br>C -2.36147400 4.51815700 7.37553400<br>H -3.21583500 5.09637700 7.70833500<br>C -2.62585600 5.40427400 5.05150400<br>H -3.48035400 6.00360000 5.34518600<br>H 2.49349600 1.13480300 6.37528900<br>H -0.63859000 4.64580000 2.40617900<br>Br 1.35988600 3.13751600 1.62344900                                                                                                                                                                                                                                         |

|                                |                                                                                                                                                                                                                                                                                                                                                                                                                                                                                                                                                                                                                                                                                                                                                                                                                                                                                                                                                                                                                                                                                     |
|--------------------------------|-------------------------------------------------------------------------------------------------------------------------------------------------------------------------------------------------------------------------------------------------------------------------------------------------------------------------------------------------------------------------------------------------------------------------------------------------------------------------------------------------------------------------------------------------------------------------------------------------------------------------------------------------------------------------------------------------------------------------------------------------------------------------------------------------------------------------------------------------------------------------------------------------------------------------------------------------------------------------------------------------------------------------------------------------------------------------------------|
|                                | Br 3.08132000 1.18403500 3.83456600<br>F 3.61870000 6.87212800 5.08448800<br>F 1.72842100 5.22386400 6.08039600<br>C -1.67026400 3.74722100 8.24946700<br>Te 2.78333900 5.24317500 4.47326500<br>Pt 1.20671900 2.68947700 3.99303000                                                                                                                                                                                                                                                                                                                                                                                                                                                                                                                                                                                                                                                                                                                                                                                                                                                |
| Br <sub>2</sub> (Phen)Pt···ClF | N 0.43851900 1.64736700 5.82838400<br>N -0.87467500 3.05080300 4.00112700<br>C -1.48452400 3.75430600 3.06380700<br>C -0.70018600 2.26435200 6.22615800<br>C 1.13581700 0.95332900 6.71015100<br>C -1.18212900 2.19091400 7.53991600<br>C 0.72323400 0.82963700 8.03947400<br>H 1.33192500 0.24997800 8.72116900<br>C -2.66632000 4.45364500 3.32243800<br>H -3.12485700 5.01512100 2.51887900<br>C -0.43002500 1.44257100 8.45907500<br>H -0.76364700 1.36125900 9.48752400<br>C -1.40295600 3.01563800 5.24819900<br>C -2.58328400 3.68918900 5.58998800<br>C -2.38919600 2.87937800 7.86574900<br>H -2.75804600 2.81988000 8.88334600<br>C -3.06003800 3.59682700 6.93212400<br>H -3.97339800 4.11968800 7.19190100<br>C -3.21908700 4.42495200 4.57758100<br>H -4.13324900 4.96473600 4.79795200<br>H 2.04373100 0.49422300 6.33474500<br>H -1.00644100 3.75418100 2.09043700<br>Br 1.19866900 2.48228500 1.52058600<br>Br 2.89025400 0.67559100 3.87400100<br>F 2.47849000 5.69783600 5.54728700<br>Pt 0.88643800 2.00885600 3.85970900<br>Cl 1.90340400 4.24954500 4.84921400 |
| Br <sub>2</sub> (Phen)Pt···BrF | N 0.42030200 1.62120700 5.82072700<br>N -0.89369000 3.02514700 3.99381600<br>C -1.50153900 3.73167300 3.05751100<br>C -0.71423000 2.24451700 6.22056200<br>C 1.12029000 0.93035400 6.70281000<br>C -1.18962000 2.18006600 7.53706300<br>C 0.71401300 0.81537600 8.03479300<br>H 1.32466100 0.23824800 8.71684300<br>C -2.67766500 4.43930300 3.31909500<br>H -3.13488400 5.00306800 2.51642500<br>C -0.43527500 1.43423800 8.45648800<br>H -0.76359800 1.36028600 9.48718500<br>C -1.41732400 2.99579000 5.24299800<br>C -2.59159200 3.67811300 5.58782000<br>C -2.39162200 2.87594300 7.86569400<br>H -2.75564500 2.82304600 8.88536900<br>C -3.06293100 3.59328400 6.93232200<br>H -3.97186700 4.12264100 7.19436500<br>C -3.22606200 4.41621800 4.57623800<br>H -4.13539800 4.96307600 4.79907300<br>H 2.02541500 0.46704200 6.32605400<br>H -1.02656800 3.72782000 2.08271400<br>Br 1.16570700 2.43269900 1.50630300                                                                                                                                                            |

|                               |                                                                                                                                                                                                                                                                                                                                                                                                                                                                                                                                                                                                                                                                                                                                                                                                                                                                                                                                                                                                                                                                                    |
|-------------------------------|------------------------------------------------------------------------------------------------------------------------------------------------------------------------------------------------------------------------------------------------------------------------------------------------------------------------------------------------------------------------------------------------------------------------------------------------------------------------------------------------------------------------------------------------------------------------------------------------------------------------------------------------------------------------------------------------------------------------------------------------------------------------------------------------------------------------------------------------------------------------------------------------------------------------------------------------------------------------------------------------------------------------------------------------------------------------------------|
|                               | Br 2.85516200 0.62600500 3.85651200<br>Br 1.98774400 4.30572200 4.83326800<br>F 2.61882700 5.85849400 5.57714600<br>Pt 0.86071900 1.97064100 3.84713400                                                                                                                                                                                                                                                                                                                                                                                                                                                                                                                                                                                                                                                                                                                                                                                                                                                                                                                            |
| Br <sub>2</sub> (Phen)Pt···IF | N 0.40777100 1.59669800 5.81130800<br>N -0.90667600 2.99990600 3.98472200<br>C -1.51314700 3.70880700 3.04906600<br>C -0.72422100 2.22404700 6.21278100<br>C 1.10896800 0.90729900 6.69387300<br>C -1.19492800 2.16608000 7.53119300<br>C 0.70686100 0.79828100 8.02751800<br>H 1.31845400 0.22227500 8.70964800<br>C -2.68456700 4.42323300 3.31277100<br>H -3.14048100 4.98879200 2.51063900<br>C -0.43932700 1.42173900 8.45081600<br>H -0.76402800 1.35282700 9.48299600<br>C -1.42745100 2.97512800 5.23542100<br>C -2.59689900 3.66449100 5.58229600<br>C -2.39313900 2.86751200 7.86161900<br>H -2.75391900 2.81927000 8.88266300<br>C -3.06440600 3.58514500 6.92841100<br>H -3.96999200 4.11941300 7.19202300<br>C -3.22987100 4.40475400 4.57131500<br>H -4.13534000 4.95729100 4.79581800<br>H 2.01189400 0.44047500 6.31639300<br>H -1.04076800 3.70174300 2.07311200<br>F 2.81386600 6.08097200 5.59188700<br>Pt 0.84042500 1.93346200 3.83349700<br>I 2.12892300 4.41099600 4.80717300<br>Br 1.13857900 2.38516900 1.49035800<br>Br 2.82966300 0.58218000 3.83938400 |

**Table S6 (Continuation).** XYZ coordinates of the optimized geometries for the studied complexes.

|                                           |                                                                                                                                                                                                                                                                                                                                                                                                                                                                                                                                                                                                                                                                                                                                                                                                                                                                                                                                                                                                                                                                                                                                                             |
|-------------------------------------------|-------------------------------------------------------------------------------------------------------------------------------------------------------------------------------------------------------------------------------------------------------------------------------------------------------------------------------------------------------------------------------------------------------------------------------------------------------------------------------------------------------------------------------------------------------------------------------------------------------------------------------------------------------------------------------------------------------------------------------------------------------------------------------------------------------------------------------------------------------------------------------------------------------------------------------------------------------------------------------------------------------------------------------------------------------------------------------------------------------------------------------------------------------------|
| I <sub>2</sub> (Phen)Pt···PF <sub>3</sub> | N 0.79980800 2.33682300 5.95193700<br>N -0.56547000 3.74452300 4.16293700<br>C -1.22598400 4.43360500 3.24728900<br>C -0.27330300 3.03310200 6.40278000<br>C 1.50219500 1.62660000 6.81891100<br>C -0.66746200 3.03489500 7.74922200<br>C 1.17538100 1.57265900 8.17535600<br>H 1.79091700 0.97448800 8.83476600<br>C -2.35163100 5.19902700 3.55929300<br>H -2.84758500 5.74175500 2.76489100<br>C 0.09561800 2.27376900 8.64737000<br>H -0.17365800 2.25007900 9.69740800<br>C -1.00408900 3.78530900 5.44566400<br>C -2.12363200 4.53133900 5.84348000<br>H -2.10476200 3.80028700 9.17386900<br>C -2.50582900 4.51908400 7.21805700<br>H -3.37062500 5.10019000 7.51759900<br>C -2.80417600 5.25452800 4.85252800<br>H -3.67331400 5.84583200 5.11828600<br>H 2.35530600 1.09484800 6.41144200<br>H -0.83417600 4.37242900 2.23753100<br>P 2.99596800 5.30303400 5.00132400<br>F 3.72677000 6.59129700 5.55844800<br>F 1.52246800 5.86591600 5.15213700<br>F 3.01943400 4.49108000 6.35680300<br>C -1.80795400 3.80242200 8.13118700<br>Pt 1.14702400 2.60651800 3.93050800<br>I 1.42821200 3.09972100 1.40844600<br>I 3.29422600 1.16793800 3.85389400 |
|                                           | Pt 1.19135000 2.62985400 3.98688000<br>N 0.79685500 2.31246400 5.99217300<br>N -0.53200800 3.75411900 4.20015700<br>C -1.16952500 4.46194100 3.28418900<br>C -0.27672700 3.01185300 6.43440600<br>C 1.48178600 1.58695300 6.85873800<br>C -0.68930900 3.00186800 7.77486300<br>C 1.13524800 1.51895800 8.20977500<br>H 1.73717500 0.90901300 8.87082500<br>C -2.29202600 5.23458500 3.58944600<br>H -2.76943000 5.79433400 2.79564100<br>C 0.05540300 2.22411000 8.67429900<br>H -0.22749400 2.19214000 9.72051900<br>C -0.98712500 3.78205100 5.47659400<br>C -2.10385500 4.53491900 5.86804300<br>H -2.13689500 3.76597200 9.18947300<br>C -2.50494300 4.51082300 7.23686600<br>H -3.36678300 5.09859600 7.53169500<br>C -2.76194300 5.27795500 4.87646100<br>H -3.62723800 5.87678100 5.13781300<br>H 2.33799600 1.05526400 6.45871600<br>H -0.76096500 4.41541200 2.28080400<br>As 2.94105700 5.20537400 4.81211400<br>F 3.75595100 6.63300300 5.36816500                                                                                                                                                                                               |



|                                            |                                                                                                                                                                                                                                                                                                                                                                                                                                                                                                                                                                                                                                                                                                                                                                                                                                                                                                                                                                                                                                                                                                                                                                                                                             |
|--------------------------------------------|-----------------------------------------------------------------------------------------------------------------------------------------------------------------------------------------------------------------------------------------------------------------------------------------------------------------------------------------------------------------------------------------------------------------------------------------------------------------------------------------------------------------------------------------------------------------------------------------------------------------------------------------------------------------------------------------------------------------------------------------------------------------------------------------------------------------------------------------------------------------------------------------------------------------------------------------------------------------------------------------------------------------------------------------------------------------------------------------------------------------------------------------------------------------------------------------------------------------------------|
|                                            | <p>F 1.39221100 5.98108000 4.76136800<br/> F 2.72202000 4.57765900 6.41139600<br/> C -1.82696400 3.77621900 8.15072100<br/> I 1.53796200 3.18133100 1.48078200<br/> I 3.35298000 1.20513500 3.93044900</p>                                                                                                                                                                                                                                                                                                                                                                                                                                                                                                                                                                                                                                                                                                                                                                                                                                                                                                                                                                                                                  |
| I <sub>2</sub> (Phen)Pt···SbF <sub>3</sub> | <p>Pt 1.20404100 2.59865500 4.00864600<br/> N 0.78221100 2.26984600 6.00836500<br/> N -0.50611000 3.74614200 4.21280400<br/> C -1.11658300 4.47642700 3.29716400<br/> C -0.28024400 2.98827800 6.44502300<br/> C 1.44690800 1.52769700 6.87544200<br/> C -0.70120500 2.98210600 7.78249700<br/> C 1.08987500 1.46052500 8.22377700<br/> H 1.67536100 0.83658500 8.88642400<br/> C -2.22278600 5.27327200 3.59873000<br/> H -2.67853500 5.85174100 2.80579700<br/> C 0.02202200 2.18620100 8.68347800<br/> H -0.26731000 2.15738600 9.72801800<br/> C -0.96767900 3.77752200 5.48635300<br/> C -2.06820100 4.55495700 5.87433000<br/> H -2.13889000 3.77340100 9.19199800<br/> C -2.47822400 4.53437300 7.24041600<br/> H -3.32706100 5.14187800 7.53280500<br/> C -2.70062600 5.31943600 4.88226700<br/> H -3.55180400 5.93898600 5.14159800<br/> H 2.29588200 0.98130300 6.48070700<br/> H -0.69979200 4.43153500 2.29766700<br/> Sb 2.97032600 5.18142500 4.72315800<br/> F 3.74565100 6.78760500 5.41452100<br/> F 1.29906500 6.05793700 4.44969700<br/> F 2.47980000 4.61625100 6.47955100<br/> C -1.82329200 3.78011400 8.15497500<br/> I 1.57420000 3.13786400 1.49912600<br/> I 3.34904600 1.14244900 3.96474700</p> |
| I <sub>2</sub> (Phen)Pt···SF <sub>2</sub>  | <p>Pt 1.26171600 2.69638600 3.99481200<br/> N 0.92494300 2.36454300 6.01058800<br/> N -0.40345500 3.89158700 4.28974100<br/> C -1.02544100 4.66253700 3.41364700<br/> C -0.14471700 3.04741300 6.48742000<br/> C 1.61751300 1.60830600 6.84516200<br/> C -0.54976200 2.98385800 7.82880200<br/> C 1.27964900 1.48812900 8.19499900<br/> H 1.88631100 0.85382800 8.82833600<br/> C -2.13371200 5.43784900 3.76106100<br/> H -2.60083700 6.04825100 2.99904300<br/> C 0.19967800 2.17089900 8.69250500<br/> H -0.07903300 2.09514600 9.73762700<br/> C -0.85349000 3.86531800 5.56820400<br/> C -1.95855400 4.61409200 5.99947100<br/> H -1.98998200 3.68963100 9.28114200<br/> C -2.35732600 4.52772300 7.36671200<br/> H -3.21375500 5.10766200 7.69140900<br/> C -2.60562400 5.41743700 5.04847100<br/> H -3.46311200 6.01311600 5.34098900<br/> H 2.46702800 1.08763400 6.41600900<br/> H -0.62070200 4.65546200 2.40727100</p>                                                                                                                                                                                                                                                                                           |

|                                            |                                                                                                                                                                                                                                                                                                                                                                                                                                                                                                                                                                                                                                                                                                                                                                                                                                                                                                                                                                                                                                                                                                                        |
|--------------------------------------------|------------------------------------------------------------------------------------------------------------------------------------------------------------------------------------------------------------------------------------------------------------------------------------------------------------------------------------------------------------------------------------------------------------------------------------------------------------------------------------------------------------------------------------------------------------------------------------------------------------------------------------------------------------------------------------------------------------------------------------------------------------------------------------------------------------------------------------------------------------------------------------------------------------------------------------------------------------------------------------------------------------------------------------------------------------------------------------------------------------------------|
|                                            | F 3.36428700 6.79201800 4.86928400<br>F 1.98712200 5.23288500 6.04507300<br>C -1.68260700 3.74611500 8.24308800<br>S 2.66587200 5.36392000 4.58909200<br>I 1.49535800 3.20387700 1.46737200<br>I 3.32161800 1.14763700 3.83143200                                                                                                                                                                                                                                                                                                                                                                                                                                                                                                                                                                                                                                                                                                                                                                                                                                                                                      |
| I <sub>2</sub> (Phen)Pt···SeF <sub>2</sub> | Pt 1.24702500 2.70610400 3.98107100<br>N 0.93029200 2.38099200 6.00479700<br>N -0.42035200 3.90088500 4.28994400<br>C -1.04141500 4.67922400 3.42069000<br>C -0.14564100 3.05056900 6.48386100<br>C 1.64343600 1.64331400 6.83728700<br>C -0.54111100 2.98638300 7.82757700<br>C 1.31674400 1.52420100 8.19003500<br>H 1.93961100 0.90586900 8.82330500<br>C -2.15165400 5.44852500 3.77520900<br>H -2.61977000 6.06606400 3.01968800<br>C 0.22732800 2.18961400 8.68978200<br>H -0.04300600 2.11496400 9.73718400<br>C -0.86560900 3.86365200 5.56892700<br>C -1.97212200 4.60561000 6.00705700<br>H -1.98115200 3.67703900 9.28731000<br>C -2.36570000 4.51264300 7.37529700<br>H -3.22482800 5.08581000 7.70469600<br>C -2.62270300 5.41379600 5.06247600<br>H -3.48118900 6.00511400 5.36087600<br>H 2.49918400 1.13556200 6.40549800<br>H -0.63671700 4.68290200 2.41449000<br>F 3.51129400 6.76050100 4.92745500<br>F 1.84962200 5.20685400 6.05488500<br>C -1.68009600 3.73619300 8.24760000<br>Se 2.70762500 5.23766800 4.52043100<br>I 1.43098600 3.16828300 1.43887400<br>I 3.27998300 1.12414100 3.79252200 |
| I <sub>2</sub> (Phen)Pt···TeF <sub>2</sub> | Pt 1.22808900 2.68075400 3.96827000<br>N 0.92522900 2.37281200 5.99880300<br>N -0.43153200 3.88821200 4.28269500<br>C -1.04695800 4.67271500 3.41522600<br>C -0.15053700 3.04188100 6.47740400<br>C 1.64966800 1.64901500 6.83317200<br>C -0.53815100 2.98675500 7.82342700<br>C 1.33191400 1.54034600 8.18882900<br>H 1.96352500 0.93357800 8.82453400<br>C -2.15477300 5.44471400 3.77127100<br>H -2.61979900 6.06694200 3.01777900<br>C 0.24016300 2.20222100 8.68791600<br>H -0.02327200 2.13593900 9.73763000<br>C -0.87423200 3.85094200 5.56205100<br>C -1.97715900 4.59662600 6.00191800<br>H -1.97248000 3.68293000 9.28605300<br>C -2.36645200 4.50833300 7.37157800<br>H -3.22386900 5.08339500 7.70201600<br>C -2.62570300 5.40775100 5.05842800<br>H -3.48147500 6.00216600 5.35846000<br>H 2.50614100 1.14274800 6.40162600<br>H -0.64159000 4.67881800 2.40954600                                                                                                                                                                                                                                       |

|                               |                                                                                                                                                                                                                                                                                                                                                                                                                                                                                                                                                                                                                                                                                                                                                                                                                                                                                                                                                                                                                                                                                   |
|-------------------------------|-----------------------------------------------------------------------------------------------------------------------------------------------------------------------------------------------------------------------------------------------------------------------------------------------------------------------------------------------------------------------------------------------------------------------------------------------------------------------------------------------------------------------------------------------------------------------------------------------------------------------------------------------------------------------------------------------------------------------------------------------------------------------------------------------------------------------------------------------------------------------------------------------------------------------------------------------------------------------------------------------------------------------------------------------------------------------------------|
|                               | F 3.61316100 6.88250200 5.09192400<br>F 1.73643400 5.21325700 6.07933300<br>C -1.67669300 3.73647300 8.24456400<br>Te 2.79070000 5.24839100 4.47313800<br>I 3.22464000 1.05285000 3.76730400<br>I 1.38661900 3.10916400 1.41784300                                                                                                                                                                                                                                                                                                                                                                                                                                                                                                                                                                                                                                                                                                                                                                                                                                                |
| I <sub>2</sub> (Phen)Pt···ClF | Pt 0.91445400 2.00663000 3.83685600<br>N 0.44377100 1.64207900 5.83090100<br>N -0.87718500 3.05362900 3.99394900<br>C -1.49645300 3.75837000 3.06440200<br>C -0.69468000 2.26275200 6.22235800<br>C 1.13207900 0.94909800 6.71984000<br>C -1.18048500 2.19193400 7.53660900<br>C 0.71743700 0.82774500 8.04833300<br>H 1.32320300 0.24754300 8.73224700<br>C -2.67751900 4.45675900 3.32685500<br>H -3.13979100 5.01826900 2.52539500<br>C -0.43499400 1.44464700 8.46143100<br>H -0.77426400 1.36789000 9.48842600<br>C -1.39858100 3.01511000 5.24342900<br>C -2.57978000 3.68787200 5.59053300<br>C -2.38632800 2.88009100 7.86469900<br>H -2.75346500 2.81991100 8.88288600<br>C -3.05700700 3.59718000 6.93191100<br>H -3.97021200 4.12086300 7.19061300<br>C -3.22281900 4.42498600 4.58421400<br>H -4.13648000 4.96251300 4.81225300<br>H 2.04147700 0.48307200 6.35544800<br>H -1.02922100 3.76450000 2.08529500<br>F 2.46544200 5.69850400 5.55647500<br>Cl 1.91731500 4.24628300 4.83569900<br>I 1.27732900 2.49992600 1.33000700<br>I 3.06916400 0.58659900 3.82124200 |
| I <sub>2</sub> (Phen)Pt···BrF | Pt 0.88857200 1.96615400 3.82408200<br>N 0.42561600 1.61529400 5.82331000<br>N -0.89556100 3.02684100 3.98616600<br>C -1.51239300 3.73475300 3.05739200<br>C -0.70853800 2.24268400 6.21656100<br>C 1.11637400 0.92569100 6.71299500<br>C -1.18787400 2.18158100 7.53358500<br>C 0.70786900 0.81367800 8.04412900<br>H 1.31528700 0.23605100 8.72872000<br>C -2.68735800 4.44220600 3.32253100<br>H -3.14799200 5.00606500 2.52181000<br>C -0.44041900 1.43700300 8.45902400<br>H -0.77444300 1.36809600 9.48828400<br>C -1.41243700 2.99487000 5.23771000<br>C -2.58723400 3.67717500 5.58756700<br>C -2.38841000 2.87771500 7.86411700<br>H -2.75082700 2.82464100 8.88436600<br>C -3.05917000 3.59467400 6.93129600<br>H -3.96772300 4.12535100 7.19203500<br>C -3.22840100 4.41674600 4.58184100<br>H -4.13690900 4.96199600 4.81209200<br>H 2.02283700 0.45504800 6.34749700<br>H -1.04820900 3.73649600 2.07691700                                                                                                                                                          |

|                              |                                                                                                                                                                                                                                                                                                                                                                                                                                                                                                                                                                                                                                                                                                                                                                                                                                                                                                                                                                                                                                                                                  |
|------------------------------|----------------------------------------------------------------------------------------------------------------------------------------------------------------------------------------------------------------------------------------------------------------------------------------------------------------------------------------------------------------------------------------------------------------------------------------------------------------------------------------------------------------------------------------------------------------------------------------------------------------------------------------------------------------------------------------------------------------------------------------------------------------------------------------------------------------------------------------------------------------------------------------------------------------------------------------------------------------------------------------------------------------------------------------------------------------------------------|
|                              | Br 2.00155300 4.30482200 4.82156600<br>F 2.59827200 5.86234700 5.59122200<br>I 3.03329200 0.53363300 3.80390300<br>I 1.24332500 2.44600800 1.31488700                                                                                                                                                                                                                                                                                                                                                                                                                                                                                                                                                                                                                                                                                                                                                                                                                                                                                                                            |
| I <sub>2</sub> (Phen)Pt···IF | Pt 0.87526800 1.95212500 3.82337500<br>N 0.41594500 1.60848500 5.82504100<br>N -0.90498300 3.01955100 3.98820800<br>C -1.51979000 3.73076900 3.06039200<br>C -0.71967900 2.23391400 6.21803800<br>C 1.10823200 0.92133700 6.71569300<br>C -1.19833400 2.17354600 7.53524200<br>C 0.70016800 0.80989500 8.04689100<br>H 1.30909700 0.23444100 8.73195000<br>C -2.69384200 4.43944000 3.32573700<br>H -3.15238500 5.00600900 2.52574600<br>C -0.44932000 1.43131200 8.46134800<br>H -0.78282000 1.36311400 9.49080500<br>C -1.42343000 2.98599200 5.23932300<br>C -2.59735600 3.66953800 5.58928200<br>C -2.39923000 2.86909700 7.86554000<br>H -2.76165200 2.81609200 8.88577800<br>C -3.06980500 3.58631200 6.93274700<br>H -3.97815900 4.11727200 7.19355000<br>C -3.23642700 4.41205500 4.58435100<br>H -4.14414900 4.95848400 4.81481300<br>H 2.01590000 0.45244000 6.35115500<br>H -1.05451000 3.73461200 2.08052400<br>F 2.77408400 6.11056100 5.64830100<br>I 2.13808100 4.43757600 4.82303200<br>I 1.22555000 2.42551600 1.31325500<br>I 3.01595200 0.51527700 3.80218700 |
